# Supplementary material
Source: PubMed Central journal article supplement (PMC2975567)

## Supplementary Online Content

Vasan R, Glazer NL, Felix JF, et al. Genetic variants associated with cardiac structure and function: a meta-analysis and replication of genome-wide association data. *JAMA*. 2009;302(2):168-178.

**eText.** Echocardiographic Methods

**eText.** Genotyping Methods

**eText.** Loci Associated With Echocardiographic Traits in Stage 1

**eTable 1.** Echocardiographic Methods

**eTable 2.** Statistical Power for Stage 2

**eTable 3.** Imputed vs genotyped SNPs among top associations in Stages 1 and 2

**eTable 4.** SNPs Associated With LV Mass With  $P$  Value  $<10^{-5}$

**eTable 5.** SNPs Associated With LV Diastolic Dimensions With  $P$  Value  $<10^{-5}$

**eTable 6.** SNPs Associated With LV Wall Thickness With  $P$  Value  $<10^{-5}$

**eTable 7.** SNPs Associated With LV Systolic Dysfunction With  $P$  Value  $<10^{-5}$

**eTable 8.** SNPs Associated With Aortic Root With  $P$  Value  $<10^{-5}$

**eTable 9.** SNPs Associated With LA Size With  $P$  Value  $<10^{-5}$

**eTable 10.** Contribution of SNPs to  $R^2$  of Traits

### References

**eFigure 1.** Quantile-Quantile (Q-Q) Plots of the Observed Against the expected  $-\log_{10}(P$  Value)

Distributions Relating SNPs to Echocardiographic Traits (Panels A-F) in a Prospective Metaanalysis.

**eFigure 2.** Regional Plots for Associations in the Region centered on Select SNPs That Were

Genome-wide Significant in Stage 1 and that Replicated in Stage 2 (Panels A and B)

This supplementary material has been provided by the authors to give readers additional information about their work.

## **Echocardiographic Methods**

### **Phenotypic Characterization & Harmonization:**

#### **Reproducibility Issues of Echo**

High-quality phenotyping is critical for GWAS. In this context, echocardiography is the most commonly used noninvasive cardiac imaging tool. Sources of variability include inter- and intra-reader and sonographer variability, beat-to-beat and day-to-day within subject variability, temporal drift within laboratories, and biases due to missing data.<sup>1;2</sup> Fortunately, studies have demonstrated methods to enhance echo reproducibility: use of centralized reading stations, standardized equipment and imaging and reading protocols, trained sonographers and readers who periodically undergo reading review sessions, averaging multiple measurements, substituting 2D measurements when M-mode measurements are unreliable, and analyses of temporal drifts.<sup>2-5</sup> Each of the 5 participating cohorts in the EchoGen consortium has implemented several of these quality control measures. Furthermore, the analytical strategy does not involve pooling of individual participant data, but rather within-cohort analyses, and a prospective meta-analysis across the cohorts.

#### ***Cardiovascular Health Study***

Participants underwent routine echocardiography at the 1989-90 and 1994-95 exams. Methods for 2-dimensional, Doppler and M-mode transthoracic echocardiography in CHS have been previously described in detail.<sup>6</sup> Left ventricular (LV) and left atrial chamber dimensions and aortic root size were determined by 2-dimensionally directed M-mode images according to the recommendations of the American Society of Echocardiography. Global LV ejection fraction was qualitatively assessed on 2-dimensional echocardiography as normal ( $\geq 55\%$ ), mildly reduced (45% to 54%), moderately reduced (30% to 44%), or severely reduced ( $< 30\%$ ). Left

ventricular mass was estimated using M-mode echocardiography.<sup>7</sup> Left ventricular fractional shortening, a quantitative measure of LV systolic function, was calculated using the formula  $([LV \text{ end diastolic dimension} - LV \text{ end systolic dimension}] / LV \text{ end diastolic dimension} \times 100)$ . Studies were evaluated by readers blinded to the participants' clinical information. Quality control measures included standardized training of echocardiography technicians and readers, observation of technicians by a trained echocardiographer, and periodic blind duplicate readings. For each trait, values were averaged over both exams.

### ***Rotterdam Study***

Transthoracic two-dimensional echocardiography was obtained by trained echocardiographers in all participants at the fourth (2002-2004) examination, using an Acuson Cypress with a 3V2c transducer. A standardized protocol was used, including two-dimensional scanning in the parasternal long axis view, parasternal short axis view, apical view and subcostal view. In addition, M-Mode scanning in the parasternal long axis view was performed (to obtain two-dimension guided M-mode measurements of the LV and aortic root), as well as pulsed wave Doppler scanning in the apical four chamber view. All studies were recorded onto videotape and assessed at the reading center by trained echocardiographers. Assessment of intra-reader and inter-reader agreement was performed during the study.

### ***MONICA-KORA***

Echocardiograms were obtained using the Sonos 1500 (Hewlett Packard Inc.) with a 2.5 or a 3.5 MHz transducer by two experienced physicians. In order to reduce inter-reader variability, all 2D-guided M-mode tracings were analyzed by a single cardiologist, blinded for all participant related data, for measurement of LV and aortic root dimensions. Measurements for M-mode-guided calculation of the left ventricular mass (LVM) were taken just below the tip of the mitral

valve, using only high-quality tracings with optimal visualizations of endocardial and epicardial surfaces throughout the cardiac cycle. Bland–Altman plots were constructed from 144 duplicate readings obtained in individuals volunteering for a blinded duplicate examination. The mean relative differences in LVM were 0.6% with a 2 SD range of 14.7%.

### ***Framingham Heart Study***

All attendees underwent routine transthoracic two-dimensionally-guided M-mode echocardiography at the second (1979-1982), fourth (1987-1990), fifth (1991-1995) and sixth (1996-1998) Offspring cohort examinations. Echocardiographic equipment for image acquisition varied across these examinations: at examination cycle 2, a Hoffrel 201 ultrasound receiver (and Aerotech transducer) was used; at examinations 4 and 5, a Hewlett Packard (model 77020AC) ultrasound machine was used; at examination 6 images were acquired using a Sonos 1000 Hewlett-Packard machine. Two-dimension guided M-mode measurements of the LV and aortic root were obtained. The reproducibility of Echo measurements was systematically assessed at the sixth examination and was very good.<sup>8</sup>

### ***Gutenberg Heart Study***

All attendees underwent routine transthoracic two-dimensionally-guided M-mode and two-dimensional echocardiography (for LV and aortic root measurements) during baseline examination. Image acquisition was obtained by PHILIPS IE33 (Philips Ultrasound, Bothell, WA) with a 1.0 – 5.0 MHz 2D transducer. All data sets were recorded electronically for reading.

### ***Study of Health in Pomerania***

Echocardiography at baseline was conducted only in subjects 45 years or older, but without age restriction at follow-up. All examinations were performed by certified physicians using the Vingmed CFM 800A system (GE Medical Systems, Waukesha, USA). Two-dimensional guided

M-Mode images of the left ventricle (recorded at papillary level) and aortic root were obtained and digitally stored. Readings were performed according to the American Society of Echocardiography convention. All echocardiographic measurements of intra-reader, intra-observer, inter-reader and inter-observer agreements revealed a mean bias ( $\pm 2$  SD) of  $<5\%$  ( $<25\%$ ).

### *Austrian Stroke Prevention Study*

Transthoracic two-dimensional echocardiography was performed by experienced cardiologists using a Vingmed CFM 750, CFM 800 and a System Five equipment depending on the year of imaging. A standardized protocol was used, including two-dimensional parasternal and apical views. Additionally, parasternal M-Mode imaging was performed, as well as pulsed, continuous and color Doppler imaging in the apical views. Two-dimensionally guided M-Mode measurements of LV dimensions, LV mass, left atrial size and aortic root diameter were obtained, whenever image quality allowed distinct visualization of endo- and epicardial borders. M-Mode measurements of global LV ejection fraction were substituted with estimated values obtained from 2-D echocardiography, when M-Mode measurements appeared unreliable.

## **Genotyping Methods:**

### **Imputation and Controlling for Population Substructure**

#### *Cardiovascular Health Study*

DNA was extracted from blood samples drawn on all participants at their baseline CHS examination in 1989-90. In 2007-2008, genotyping was performed at the General Clinical Research Center's Phenotyping/Genotyping Laboratory at Cedars-Sinai using the Illumina 370CNV BeadChip system on 3980 CHS participants who were free of CVD at baseline, consented to genetic testing, and had DNA available for genotyping. Samples were excluded for Mendelian inconsistency, or discordance with prior genotyping. Overall, genotyping was attempted in 3,980 participants and was successful in 3,865 persons. Because the other 4 cohorts in the present investigation were predominantly of European ancestry, the African American CHS participants were excluded from this analysis. Those with available echocardiographic measures from this latter sample constituted the CHS sample for the present investigation. SNPs were excluded from analysis/imputation if: the call rate was <97%; SNPs were monomorphic; the HWE p-value <math>10^{-5}</math>. After exclusions, 306,655 autosomal SNPs were used to impute to the HapMap.

#### *Rotterdam Study*

From the 7129 participants of the Rotterdam Study who visited the research center in 1990-1993, 6680 (83.7%) had plated DNA. Of these, 6449 individuals had proper quality DNA samples and were considered for genotyping using the Illumina Infinium II HumanHap550chip v3.0 array in 2007-2008. 6239 participants had a within-person call rate of 97.5% or above. SNPs were

excluded if they had a minor allele frequency (MAF)  $\leq 1\%$ , the HWE p-value was  $< 10^{-6}$ , or the SNP call rate was  $\leq 90\%$ , resulting in data on 512,349 SNPs eligible for analyses.

### ***MONICA-KORA***

The MONICA/KORA genotyping was conducted on an Affymetrix 500K array 2 chip set (Sty I and NSP I). The mean and median call rates were 98.3% and 98.5%, respectively (details at [http://epi.gsf.de/kora-gen/seiten/kora500k\\_e.php](http://epi.gsf.de/kora-gen/seiten/kora500k_e.php)).

### ***Framingham Heart Study***

As part of the SNP Health Association Resource (SHARe) project, 9274 FHS participants belonging to the original, Offspring and third generation cohorts were genotyped, and of these 8508 had a within-person call rate  $\geq 97\%$ . Affymetrix conducted NHLBI funded genotyping on the GeneChip® Human Mapping 500K Array Set and 50K Human Gene Focused Panel, using the Bayesian Robust Linear Modeling Mahalanobis distance (BRLMM) algorithm.<sup>9</sup> Genotyping became available in October 2007. The average call rate was about 98%. FHS data cleaning was conducted simultaneously by the NCBI and FHS investigators following principles reviewed by Pompanon et al.<sup>10</sup> The cleaning focused on Mendelian or excessive recombination errors. SNPs were excluded if they had a call rate  $< 95\%$ , or a Hardy-Weinberg equilibrium (HWE) p-value  $< 10^{-6}$ , resulting in a final number of 503,551 SNPs eligible for analyses. Individuals who were members of the Offspring cohort and who had available echocardiographic measurements were eligible for the present investigation.

### ***Gutenberg Heart Study***

Genotyping was conducted on 3341 participants (95% of 3500 attendees) of the GHS with a sample of genomic DNA available at baseline examination and written consent for genetic

analysis. Genotyping was performed using the Affymetrix Genome-wide Human SNP Array 6.0 from December 2007 to April 2008. SNPs were excluded if they had a minor allele frequency (MAF)  $\leq 1\%$ , the HWE p-value was  $< 10^{-4}$ , or the call rate was  $\leq 90\%$ . After exclusions, 643,784 SNPs remained eligible for analyses. DNA samples were excluded if they had a within-person call rate of  $< 97\%$ . In total, 3300 persons who met this criterion had echocardiographic data available.

### ***Study of Health in Pomerania***

The 4105 SHIP samples were genotyped using the Affymetrix Human SNP Array 6.0. Hybridization of genomic DNA was done in accordance with the manufacturer's standard recommendations. Genotypes were determined using the Birdseed2 clustering algorithm. For quality control purposes, several control samples were added. On the chip level, only subjects with a genotyping rate on QC probesets (QC call rate) of at least 86% were included. The overall genotyping efficiency of the GWA was 98.56%. The genetic data analysis workflow was created using the Software InforSense. Genetic data were stored using the database Caché (InterSystems).

### ***Austrian Stroke Prevention Study***

Genotyping was performed in 947 participants using the Illumina Human610-Quad BeadChip according to the manufacturer's protocol. In total 882 DNA samples met QC criteria. Exclusion criteria were samples with low call rate ( $< 98\%$ ,  $n=32$ ), with excess autosomal heterozygosity ( $> 0.350$ ,  $n=1$ ), with sex-mismatch ( $n=11$ ), or as outliers identified by the IBS clustering analysis ( $> 3$  standard deviations from population mean,  $n=19$  or IBS probabilities  $> 97\%$ ,  $n=2$ ).



In total 550635 markers out of 620901 passed QC. Overall, 30232 markers were excluded due to low (<98%) call rate, because they were out of HWE ( $P < 1e-06$ ), or had low (<1%) minor allele frequency.

### **Imputation and controlling for population stratification**

The various GWAS used different genotyping platforms/chips, so that they do not include the same sets of SNPs. Many specific SNPs genotyped on one platform are not on another array (and *vice versa*) but they are highly correlated with a different SNP on that array. For instance, 82% of all 2.2 million HapMap CEU SNPs  $\geq 5\%$  MAF are captured by Affymetrix 500K and Illumina 550K arrays at  $r^2 \geq 0.5$  with mean maximum  $r^2$  to Affy SNPs of 0.91 and to Illumina of 0.95; only 3% of SNPs are not captured by either. Investigators have annotated the set of all variants on different platforms that capture at an  $r^2 > 0.5$  an allele on an alternate platform. Consequently, new algorithms allow imputation of all 2.5 million HapMap SNPs using a HapMap sample as a scaffold.<sup>11;12</sup> FHS, Rotterdam, MONICA-KORA, GHS and ASPS used the Markov Chain Haplotyping (MACH) algorithm (<http://www.sph.umich.edu/csg/abecasis/MaCH/>) and the HapMap CEU sample (release 22, build 36) to impute the untyped HapMap SNPs. CHS has used the BIMBAM algorithm for imputation (available at <http://stephenslab.uchicago.edu/software.html>).<sup>13</sup> SHIP used the IMPUTE algorithm (<http://www.stats.ox.ac.uk/~marchini/software/gwas/impute.html>) and the HapMap CEU sample for imputation. For each imputed SNP a reliability of imputation was estimated (as the ratio of the empirically observed dosage variance to the expected binomial dosage variance). Thus, all studies have imputed the genotype “dosage,” which is the expected number of minor alleles, for all SNPs. We performed meta-analysis on each imputed SNP.

All cohorts used genomic control to estimate population stratification.<sup>14</sup> For this purpose, we evaluated quantile-quantile (Q-Q) plots and  $\lambda$  estimates to ensure that the p value distributions in each of the 5 cohorts conformed to a null distribution at all but the extreme tail. The quantile-quantile (Q-Q) plot of our inverse variance meta-analysis results for each echocardiographic trait (**eFigure 1, Panels A-F** in supplementary online material) shows the distribution of the observed test statistic (negative log of p-values, on the Y-axis) plotted against the distribution of test statistic expected under the null-hypothesis (on the X-axis). For each echocardiographic trait, we note that the observed p-values conform to the null distribution across the entire range until about  $p < 10^{-4}$ ; we expect that true positive associations reside beyond this region and that population substructure is negligible for analyses of any of the echocardiographic traits.

In the FHS dataset, we evaluated the principal components (PC) approach additionally.<sup>15</sup> First, we applied PC analysis (calculated through Eigenstrat, <http://www.broad.mit.edu/tools/software.html>) to genotypic data to infer continuous axes of genetic variation (principal components – PCs) describing ancestral heterogeneity (top eigenvectors of a covariance matrix). Next, we assessed the association between the PCs and echocardiographic phenotypes. Since the FHS consists of families, the principal components were built using a subset of biologically unrelated subjects. Thus, we created 10 PC using Eigenstrat. We determined that PC scores (generated from top 10 PC identified by EIGENSTRAT in the FHS 550K genotype data) accounted for <1% of the variation in echo phenotypes; the regression coefficients analyzed in the 550K FHS age- and sex-adjusted GWAS data with and without adjusting for the PC are highly correlated ( $r=0.999$ ). Thus, we do not expect population substructure to influence our results substantively.

## Description of Loci Associated ( $p < 5 \times 10^{-7}$ ) With Echocardiographic Traits in Stage 1

For LVM, 3 SNPs clustered at 14 q12 exceeded the threshold of genome-wide significance (only the top SNP is listed in Table 2). This locus is intergenic, the nearest gene *NOVA1* is 270 kb distant downstream. *NOVA1* encodes neuro-oncological ventral antigen 1, a neuron-specific RNA-binding protein expressed mainly in neural tissue.<sup>16</sup> This protein is a member of the Nova family of paraneoplastic disease antigens (being recognized and inhibited by paraneoplastic antibodies), and is known to regulate RNA splicing in developing neurons.<sup>16</sup> It is expressed in cardiac tissue but has no known role in cardiac physiology in the published literature. Two other loci on chromosomes 2 and 15 are also intergenic being adjacent to *CALM2* and *MEIS2* genes (both genes being expressed in the heart). *CALM2* codes for calmodulin, which binds calcium and thereby regulates the activity of numerous protein kinases and phosphatases involved in cellular processes. Calmodulin plays a critical role in mediating cardiac hypertrophy.<sup>17,18</sup> *MEIS2* encodes a homeobox protein belonging to the TALE ('three amino acid loop extension') family, a group of highly conserved transcription regulators that are essential contributors to developmental programs.

For LVDD, 24 SNPs at 6q22 emerged as genome-wide significant. Several of these SNPs were in linkage disequilibrium (LD) with the most strongly associated SNP, *rs89107*, and with intragenic variants in the gene *SLC35F1* (solute carrier family 35, member F1). See main manuscript for discussion of this locus.

Five SNPs at 3 separate loci on chromosomes 10q23, 16q23 and 5q21 were associated with LVWT. A SNP at 10q23, *rs7910620*, is in *GRID1* (a gene expressed in cardiac tissue).

Another SNP at 16q23, [rs2059238](#), is in *WWOX* (WW domain containing oxidoreductase, expressed in the heart), which encodes a protein (an oxidoreductase) that contains 2 WW domains and a short-chain dehydrogenase/reductase domain (SRD).<sup>19</sup> Proteins with WW domains play a critical role in the regulation of protein degradation, transcription, and RNA splicing, and the presence of an SRD domain may suggest a role for *WWOX* in steroid metabolism.<sup>19</sup> In experimental animals this oxidoreductase is a mediator of tumor necrosis factor-alpha-induced apoptosis.<sup>20</sup> The 3 SNPs at 5q21 are in perfect LD with each other, are intergenic, and located between 36.6- 80 kb from *SLC25A46*, which is a member of the solute carrier family 25 (SLC25, which transport molecules over the mitochondrial membrane). It is expressed in cardiac tissue but its exact role in disease is unclear.

A SNP in *HNIL* (hematological and neurological expressed 1-like protein) was associated with LV systolic dysfunction. *HNIL* is expressed in cardiac tissue but its function is not known.

One hundred and forty-nine SNPs in 7 loci were associated with aortic root diameter: 120 SNPs at 17p13, 1 at 17q21, 10 at 1p21, 10 at 5q23, 2 at 12p12, 5 at 12q14, and 1 at 15q24. See the text of the main manuscript for a discussion of genetic loci on chromosomes 5q23, 12p12 and 12q14, and 17p13. The SNP at locus 17q21, [rs17608766](#), is in *GOSR2* (Golgi SNAP receptor complex member 2). *GOSR2* is expressed in aortic tissue, and encodes a membrane protein that regulates trafficking of proteins across the medial- and trans-Golgi compartments.<sup>21</sup> *GOSR2* has been implicated in hypertension, in part due to its chromosomal location near a genetic linkage site and its function regulating transmembrane transport.<sup>21</sup> [rs893817](#) at 15q24 is in *LOXLI* (lysyl oxidase-like 1; expressed in aorta and vascular tissues), which is an extracellular copper-dependent enzyme that catalyses the formation of lysine-derived

crosslinks and elastin polymers at sites of elastogenesis. Lysyl oxidase null mice die in the perinatal period and have aortic aneurysms at necropsy, possibly due to increased proteolytic degradation of elastin that has deficient crosslinks.<sup>22</sup> For the locus on chromosome 1, the closest gene is *PALMD* (palmdelphin; 62 kb). *PALMD* is expressed in many tissues, is most abundant in cardiac (including the aorta) and skeletal muscle, and regulates intracellular signaling and membrane-cytoskeletal interactions.<sup>23</sup>

## **Tables and Figures**

**eTable 1. Echocardiographic Methods**

|                          | <b>CHS</b>                | <b>RS</b>             | <b>KORA</b>   | <b>FHS</b>            | <b>GHS</b>                | <b>SHIP</b>             | <b>ASPS</b>             |
|--------------------------|---------------------------|-----------------------|---------------|-----------------------|---------------------------|-------------------------|-------------------------|
| Year of Echo             | 1989-1990                 | 2002-2004             | 1994          | 1978-1998             | 2007                      | 1997-2006               | 1991-1994 and 1999-2003 |
| Instrument               | Toshiba                   | Acuson                | HP sonos 1500 | HP                    | Philips                   | Vingmed                 | Vingmed                 |
| Readers                  | MD/<br>CertifiedTech<br>s | MD/<br>CertifiedTechs | MD            | MD/<br>CertifiedTechs | MD/<br>CertifiedTech<br>s | Certified<br>Physicians | MD                      |
| M-Mode,<br>ASE<br>method | Yes                       | Yes                   | Yes           | Yes                   | Yes                       | Yes                     | Yes                     |

ASE: American Society of Echocardiography.

eTable 2. Statistical Power for Stage 2

| Trait                   | RSID       | chr | effallele | Stage 1                |           |        | Stage 2 Power            |                     |
|-------------------------|------------|-----|-----------|------------------------|-----------|--------|--------------------------|---------------------|
|                         |            |     |           | P-value                | Meta Beta | SE     | replicate Stage 1 effect | 80% power for beta= |
| LV mass                 | rs17568359 | 14  | C         | $8.53 \times 10^{-8}$  | -4.7780   | 0.8922 | 0.86                     | -4.3570             |
|                         | rs7565161  | 2   | A         | $3.19 \times 10^{-7}$  | -3.0130   | 0.5894 | 0.95                     | -2.2960             |
| LV diastolic dimensions | rs89107    | 6   | G         | $1.14 \times 10^{-8}$  | -0.0290   | 0.0051 | 0.90                     | -0.0247             |
|                         | rs11153768 | 6   | T         | $4.61 \times 10^{-7}$  | 0.0260    | 0.0051 | 0.83                     | 0.0249              |
| LV wall thickness       | rs7910620  | 10  | G         | $5.62 \times 10^{-9}$  | 0.1652    | 0.0284 | 1.0                      | 0.0756              |
|                         | rs2059238  | 16  | A         | $1.89 \times 10^{-7}$  | -0.0197   | 0.0038 | 0.89                     | -0.0171             |
|                         | rs17132261 | 5   | T         | $3.36 \times 10^{-7}$  | 0.0601    | 0.0118 | 0.80                     | 0.0597              |
| LVSD                    | rs2235487  | 16  | G         | $1.98 \times 10^{-7}$  | -0.3822   | 0.0735 | 1.0                      | -0.2070             |
| Aortic root size        | rs10852932 | 17  | T         | $4.32 \times 10^{-11}$ | 0.0311    | 0.0047 | 0.98                     | 0.0212              |
|                         | rs4523957  | 17  | G         | $1.87 \times 10^{-10}$ | 0.0306    | 0.0048 | 0.98                     | 0.0209              |
|                         | rs413016   | 17  | T         | $3.34 \times 10^{-7}$  | 0.0276    | 0.0054 | 0.90                     | 0.0233              |
|                         | rs17608766 | 17  | C         | $1.43 \times 10^{-7}$  | 0.0381    | 0.0072 | 0.93                     | 0.0300              |
|                         | rs7543130  | 1   | A         | $8.08 \times 10^{-9}$  | 0.0258    | 0.0045 | 0.93                     | 0.0203              |
|                         | rs17470137 | 5   | A         | $1.63 \times 10^{-8}$  | 0.0287    | 0.0051 | 0.94                     | 0.0225              |
|                         | rs4026608  | 12  | C         | $7.30 \times 10^{-8}$  | -0.0256   | 0.0048 | 0.92                     | -0.0210             |
|                         | rs10770612 | 12  | G         | $2.40 \times 10^{-7}$  | 0.0346    | 0.0067 | 0.96                     | 0.0257              |
|                         | rs893817   | 15  | G         | $4.12 \times 10^{-7}$  | 0.0237    | 0.0047 | 0.87                     | 0.0214              |

Power estimates computed using Quanto software, version 1.2.3 (<http://hydra.usc.edu/GxE>).



**eTable 3.** Imputed vs genotyped SNPs among top associations in Stages 1 and 2

| Trait                   | SNPID      | Stage 1  |              |          |                |         |              |         |              |         |              | Stage 2  |              |          |              |
|-------------------------|------------|----------|--------------|----------|----------------|---------|--------------|---------|--------------|---------|--------------|----------|--------------|----------|--------------|
|                         |            | CHS      |              | RS       |                | KORA    |              | FHS     |              | GHS     |              | SHIP     |              | ASPS     |              |
|                         |            | imputed  | o/e variance | imputed  | o/e variance * | imputed | o/e variance | imputed | o/e variance | imputed | o/e variance | imputed  | o/e variance | imputed  | o/e variance |
| LV mass                 | rs17568359 | 1        | 0.775        | 1        | 0.938          | 0       | 1            | 1       | 1            | 0       | 1            | 0        | 1            | 1        | 0.985        |
|                         | rs7565161  | 1        | 0.90         | 1        | 0.94           | -       | -            | 1       | 0.26         | 1       | 0.997        | 1        | 0.869        | 1        | 0.944        |
|                         | rs8031633  | -        | -            | 1        | 0.68           | 1       | 0.57         | 1       | 0.84         | 1       | 0.99         | -        | -            | -        | -            |
| LVDD                    | rs89107    | 1        | 0.92         | 1        | 0.999          | 1       | 0.99         | 1       | 0.99         | 1       | 0.71         | 1        | 0.997        | <b>0</b> | 1            |
|                         | rs11153768 | 1        | 0.98         | 1        | 0.97           | 1       | 0.96         | 1       | 0.98         | 1       | 0.40         | <b>0</b> | 1            | 1        | 0.975        |
| LVWT                    | rs7910620  | 1        | <0.2         | 1        | 0.201          | NA      | NA           | 1       | 0.344        | 1       | 1            | 0        | 1            | 1        | 0.16         |
|                         | rs2059238  | 1        | 0.784        | 1        | 0.976          | 1       | 0.351        | 1       | 0.595        | 1       | 0.436        | 1        | 0.941        | 1        | 0.96         |
|                         | rs17132261 | 1        | 0.453        | 1        | 0.879          | 1       | 0.954        | 1       | 0.996        | 0       | 1            | 0        | 1            | 1        | 0.93         |
| LV systolic dysfunction | rs2235487  | 0        | 1            | 0        | 0.997          | 1       | 0.73         | 1       | 0.84         | 1       | 0.87         | 1        | 0.997        | 0        | 1            |
| Aortic root             | rs10852932 | 1        | 0.967        | 1        | 0.999          | NA      | NA           | 1       | 1            | NA      | NA           | 1        | 0.921        | 1        | 0.998        |
|                         | rs4523957  | 1        | 0.882        | 1        | 0.928          | 1       | 0.825        | 1       | 0.88         | NA      | NA           | 1        | 0.822        | 1        | 0.924        |
|                         | rs413016   | 0        | 1            | 0        | 1              | 1       | 0.879        | 1       | 0.948        | NA      | NA           | 1        | 0.879        | 0        | 1            |
|                         | rs17608766 | 1        | 0.296        | 0        | 1              | 1       | 0.854        | 1       | 0.876        | NA      | NA           | 1        | 0.976        | 0        | 1            |
|                         | rs7543130  | 0        | 1            | 0        | 1              | 1       | 0.921        | 1       | 0.975        | NA      | NA           | 1        | 0.974        | 0        | 1            |
|                         | rs17470137 | 1        | 0.883        | 1        | 0.996          | 1       | 0.921        | 1       | 0.975        | NA      | NA           | 1        | 0.935        | 1        | 0.979        |
|                         | rs4026608  | 1        | 0.964        | 1        | 0.889          | 1       | 0.698        | 1       | 0.855        | NA      | NA           | <b>0</b> | 1            | 1        | 0.869        |
|                         | rs10770612 | <b>0</b> | 1            | <b>0</b> | 1              | 1       | 0.433        | 1       | 0.452        | NA      | NA           | 1        | 0.988        | <b>0</b> | 1            |
| rs893817                | 0          | 1        | 0            | 1        | 1              | 0.879   | 1            | 0.948   | NA           | NA      | 1            | 0.896    | 0            | 1        |              |

NA= not available. 0= genotyped. 1= imputed. O/E= observed to expected variance binomial dosage.

**SNPs that replicated in stage 2 are shown in bold.** Note that **rs89107** is in strong LD ( $R^2$ 1,  $D'$ 1) with rs281868 that is genotyped in 4 studies (all except FHS) and has a meta-analytic p value of  $1.37 \times 10^{-8}$ . **rs11153768** is in LD ( $R^2$ 0.59,  $D'$ 0.85) with rs6911339 that was genotyped in CHS and RS and has meta-analytic p of  $2.29 \times 10^{-7}$ . **rs17470137** is in LD with rs17469907 that was genotyped in CHS and RS and has a meta-analytic p of  $1.23 \times 10^{-8}$ . **rs4026608** is in LD with rs899844 ( $R^2$ 0.93,  $D'$ 1) that was genotyped in CHS and RS and has a meta-analytic p of  $1.60 \times 10^{-7}$ .

\* In RS, dosage data were used for all SNPs. Therefore, imputed data is overwritten onto genotyped data for originally typed SNPs. Thus, o/e variance is available for all SNPs.

**eTable 4. SNPs Associated With LV Mass With  $P$  Value  $<10^{-5}$** 

| SNP        | chromosome | position  | meta-analysis P-value | meta-analysis beta | meta-analysis SE | coded allele | allele frequency | Nearest Gene |
|------------|------------|-----------|-----------------------|--------------------|------------------|--------------|------------------|--------------|
| rs17568359 | 14         | 25707714  | $8.53 \times 10^{-8}$ | -4.778             | 0.892            | C            | 0.072            | NOVA1        |
| rs11846075 | 14         | 25712317  | $1.39 \times 10^{-7}$ | -4.702             | 0.893            | A            | 0.071            | NOVA1        |
| rs17489969 | 14         | 25712480  | $1.40 \times 10^{-7}$ | -4.716             | 0.896            | C            | 0.071            | NOVA1        |
| rs7565161  | 2          | 47348531  | $3.19 \times 10^{-7}$ | -3.013             | 0.589            | A            | 0.403            | CALM2        |
| rs8031633  | 15         | 35327294  | $3.71 \times 10^{-7}$ | 16.617             | 3.269            | C            | 0.006            | Mx10IS2      |
| rs8031514  | 15         | 35327276  | $3.71 \times 10^{-7}$ | 16.619             | 3.269            | C            | 0.006            | Mx10IS2      |
| rs8026758  | 15         | 35327458  | $3.74 \times 10^{-7}$ | 16.607             | 3.268            | T            | 0.006            | Mx10IS2      |
| rs12619308 | 2          | 179437515 | $8.22 \times 10^{-7}$ | -4.477             | 0.908            | T            | 0.068            | CCDC141      |
| rs6501252  | 17         | 74324977  | $1.41 \times 10^{-6}$ | 55.595             | 11.525           | T            | 0.005            | USP36        |
| rs4303351  | 13         | 39258754  | $1.60 \times 10^{-6}$ | 2.617              | 0.545            | A            | 0.231            | COG6         |
| rs6563751  | 13         | 39267347  | $1.63 \times 10^{-6}$ | 2.635              | 0.550            | A            | 0.231            | COG6         |
| rs6752756  | 2          | 179449350 | $2.72 \times 10^{-6}$ | -4.305             | 0.918            | T            | 0.066            | CCDC141      |
| rs1873163  | 2          | 179461940 | $2.84 \times 10^{-6}$ | -4.482             | 0.957            | T            | 0.060            | CCDC141      |
| rs198285   | 7          | 24231633  | $3.57 \times 10^{-6}$ | -2.361             | 0.509            | C            | 0.498            | NPY          |
| rs904162   | 2          | 47363828  | $3.61 \times 10^{-6}$ | -2.511             | 0.542            | T            | 0.446            | TACSTD1      |
| rs4297022  | 8          | 141182923 | $4.67 \times 10^{-6}$ | -2.317             | 0.506            | A            | 0.430            | NIBP         |
| rs6578069  | 8          | 141182422 | $4.70 \times 10^{-6}$ | -2.307             | 0.504            | G            | 0.432            | NIBP         |
| rs6116929  | 20         | 574081    | $5.11 \times 10^{-6}$ | 2.254              | 0.494            | G            | 0.495            | SRXN1        |
| rs7224628  | 17         | 61912594  | $5.22 \times 10^{-6}$ | -2.094             | 0.460            | G            | 0.375            | PRKCA        |
| rs3848418  | 17         | 61911986  | $5.36 \times 10^{-6}$ | -2.088             | 0.459            | T            | 0.376            | PRKCA        |
| rs4603426  | 13         | 39237678  | $5.50 \times 10^{-6}$ | 2.348              | 0.517            | G            | 0.263            | COG6         |
| rs9532427  | 13         | 39219352  | $5.68 \times 10^{-6}$ | 2.331              | 0.514            | G            | 0.265            | COG6         |
| rs7225164  | 17         | 61912613  | $5.75 \times 10^{-6}$ | -2.086             | 0.460            | A            | 0.375            | PRKCA        |
| rs9548923  | 13         | 39229197  | $5.79 \times 10^{-6}$ | 2.333              | 0.515            | G            | 0.265            | COG6         |
| rs12584772 | 13         | 39201803  | $5.88 \times 10^{-6}$ | 2.332              | 0.515            | G            | 0.266            | COG6         |
| rs9548903  | 13         | 39201773  | $5.88 \times 10^{-6}$ | 2.332              | 0.515            | G            | 0.267            | COG6         |
| rs9548921  | 13         | 39226132  | $5.89 \times 10^{-6}$ | 2.328              | 0.514            | T            | 0.265            | COG6         |
| rs7329513  | 13         | 39221186  | $5.90 \times 10^{-6}$ | 2.328              | 0.514            | C            | 0.266            | COG6         |

|            |    |           |                       |         |       |   |       |               |
|------------|----|-----------|-----------------------|---------|-------|---|-------|---------------|
| rs9548902  | 13 | 39201713  | $5.90 \times 10^{-6}$ | 2.332   | 0.515 | T | 0.267 | COG6          |
| rs6563745  | 13 | 39203591  | $5.94 \times 10^{-6}$ | 2.331   | 0.515 | A | 0.266 | COG6          |
| rs6504434  | 17 | 61901919  | $6.12 \times 10^{-6}$ | -2.078  | 0.460 | C | 0.375 | PRKCA         |
| rs8074294  | 17 | 61902137  | $6.42 \times 10^{-6}$ | -2.071  | 0.459 | G | 0.376 | PRKCA         |
| rs11934726 | 4  | 102572384 | $7.33 \times 10^{-6}$ | -15.876 | 3.541 | T | 0.015 | PPP3CA        |
| rs7727791  | 5  | 56873677  | $7.56 \times 10^{-6}$ | 2.156   | 0.482 | A | 0.297 | DKFZp686D0972 |
| rs3848421  | 17 | 61903483  | $8.68 \times 10^{-6}$ | -2.079  | 0.468 | G | 0.364 | PRKCA         |
| rs9593407  | 13 | 79113330  | $9.75 \times 10^{-6}$ | 2.278   | 0.515 | C | 0.250 | NDFIP2        |
| rs10769246 | 11 | 5787516   | $9.84 \times 10^{-6}$ | -7.463  | 1.688 | T | 0.026 | OR52N2        |

**eTable 5. SNPs Associated With LV Diastolic Dimensions With *P* Value <10<sup>-5</sup>**

| SNP        | chromosome | position  | meta-analysis P-value | meta-analysis beta | meta-analysis SE | coded allele | allele frequency | Nearest Gene |
|------------|------------|-----------|-----------------------|--------------------|------------------|--------------|------------------|--------------|
| rs89107    | 6          | 118684736 | 1.14x10-8             | -0.029             | 0.005            | G            | 0.501            | SLC35F1      |
| rs4946333  | 6          | 118672358 | 1.34x10-8             | -0.029             | 0.005            | G            | 0.499            | SLC35F1      |
| rs281868   | 6          | 118680754 | 1.37x10-8             | -0.029             | 0.005            | A            | 0.494            | SLC35F1      |
| rs6912208  | 6          | 118673209 | 1.41x10-8             | -0.029             | 0.005            | G            | 0.499            | SLC35F1      |
| rs283077   | 6          | 118676372 | 2.24x10-8             | -0.028             | 0.005            | T            | 0.497            | SLC35F1      |
| rs9401060  | 6          | 118668041 | 2.60x10-8             | -0.029             | 0.005            | A            | 0.492            | SLC35F1      |
| rs9489327  | 6          | 118668582 | 2.95x10-8             | -0.028             | 0.005            | T            | 0.500            | SLC35F1      |
| rs11153730 | 6          | 118774215 | 5.06x10-8             | -0.028             | 0.005            | T            | 0.501            | SLC35F1      |
| rs937277   | 6          | 118779768 | 6.93x10-8             | -0.029             | 0.005            | G            | 0.353            | SLC35F1      |
| rs1761631  | 6          | 118783577 | 7.72x10-8             | -0.029             | 0.005            | A            | 0.351            | SLC35F1      |
| rs11758375 | 6          | 118710463 | 1.07x10-7             | -0.027             | 0.005            | T            | 0.501            | SLC35F1      |
| rs927348   | 6          | 118698800 | 1.10x10-7             | -0.027             | 0.005            | G            | 0.503            | SLC35F1      |
| rs6927800  | 6          | 118710815 | 1.12x10-7             | -0.027             | 0.005            | C            | 0.501            | SLC35F1      |
| rs11968293 | 6          | 118741391 | 1.19x10-7             | -0.027             | 0.005            | A            | 0.488            | SLC35F1      |
| rs7749263  | 6          | 118672943 | 1.22x10-7             | -0.027             | 0.005            | A            | 0.505            | SLC35F1      |
| rs1572226  | 6          | 118741772 | 1.91x10-7             | -0.027             | 0.005            | C            | 0.488            | SLC35F1      |
| rs731695   | 6          | 118695183 | 1.97x10-7             | -0.027             | 0.005            | T            | 0.502            | SLC35F1      |
| rs7772845  | 6          | 118752709 | 2.09x10-7             | 0.026              | 0.005            | T            | 0.445            | SLC35F1      |
| rs1334489  | 6          | 118746080 | 2.29x10-7             | 0.026              | 0.005            | A            | 0.445            | SLC35F1      |
| rs6911339  | 6          | 118760314 | 2.29x10-7             | 0.026              | 0.005            | A            | 0.443            | SLC35F1      |
| rs7452622  | 6          | 118704990 | 3.02x10-7             | 0.027              | 0.005            | A            | 0.481            | SLC35F1      |
| rs11153768 | 6          | 119094845 | 4.61x10-7             | 0.026              | 0.005            | T            | 0.446            | C6orf204     |
| rs11970286 | 6          | 118787067 | 4.69x10-7             | 0.026              | 0.005            | T            | 0.454            | SLC35F1      |
| rs11968176 | 6          | 119007633 | 6.50x10-7             | 0.026              | 0.005            | A            | 0.462            | PLN          |
| rs6906287  | 6          | 119069433 | 6.72x10-7             | 0.025              | 0.005            | C            | 0.454            | C6orf204     |
| rs4307206  | 6          | 118920013 | 6.81x10-7             | 0.025              | 0.005            | A            | 0.451            | C6orf204     |
| rs12661338 | 6          | 118901383 | 6.87x10-7             | 0.025              | 0.005            | A            | 0.450            | C6orf204     |
| rs17825393 | 6          | 118879276 | 6.90x10-7             | 0.025              | 0.005            | C            | 0.450            | C6orf204     |

|            |    |           |                       |        |       |   |       |          |
|------------|----|-----------|-----------------------|--------|-------|---|-------|----------|
| rs9481842  | 6  | 119081491 | 7.03x10 <sup>-7</sup> | -0.029 | 0.006 | G | 0.267 | C6orf204 |
| rs11752626 | 6  | 118895345 | 7.36x10 <sup>-7</sup> | 0.025  | 0.005 | T | 0.450 | C6orf204 |
| rs4945623  | 6  | 119087249 | 7.67x10 <sup>-7</sup> | 0.025  | 0.005 | C | 0.455 | C6orf204 |
| rs11967375 | 6  | 118930668 | 7.87x10 <sup>-7</sup> | 0.025  | 0.005 | G | 0.455 | C6orf204 |
| rs10872167 | 6  | 119095055 | 8.06x10 <sup>-7</sup> | 0.025  | 0.005 | A | 0.481 | C6orf204 |
| rs17227124 | 6  | 118848075 | 8.72x10 <sup>-7</sup> | 0.025  | 0.005 | C | 0.452 | C6orf204 |
| rs763254   | 6  | 118993308 | 1.14x10 <sup>-6</sup> | 0.025  | 0.005 | C | 0.453 | PLN      |
| rs17226667 | 6  | 118828321 | 1.27x10 <sup>-6</sup> | 0.025  | 0.005 | G | 0.452 | C6orf204 |
| rs9656375  | 7  | 128308476 | 1.42x10 <sup>-6</sup> | -0.037 | 0.008 | A | 0.188 | ATP6V1F  |
| rs8023331  | 15 | 21218853  | 1.82x10 <sup>-6</sup> | -0.645 | 0.135 | T | 0.006 | MKRN3    |
| rs1006932  | 6  | 118749444 | 1.89x10 <sup>-6</sup> | -0.025 | 0.005 | A | 0.400 | SLC35F1  |
| rs2501470  | 6  | 118759441 | 1.95x10 <sup>-6</sup> | -0.025 | 0.005 | G | 0.394 | SLC35F1  |
| rs11153725 | 6  | 118664651 | 2.03x10 <sup>-6</sup> | -0.025 | 0.005 | C | 0.395 | SLC35F1  |
| rs2359630  | 4  | 7755695   | 2.19x10 <sup>-6</sup> | 0.027  | 0.006 | T | 0.282 | SORCS2   |
| rs6678829  | 1  | 202104183 | 2.36x10 <sup>-6</sup> | -0.028 | 0.006 | G | 0.225 | SNRPx10  |
| rs7533264  | 1  | 202104722 | 2.37x10 <sup>-6</sup> | -0.028 | 0.006 | G | 0.225 | SNRPx10  |
| rs9970867  | 1  | 202103619 | 2.37x10 <sup>-6</sup> | -0.028 | 0.006 | C | 0.225 | SNRPx10  |
| rs9969998  | 1  | 202103370 | 2.42x10 <sup>-6</sup> | -0.028 | 0.006 | T | 0.225 | SNRPx10  |
| rs7540013  | 1  | 202102461 | 2.47x10 <sup>-6</sup> | -0.028 | 0.006 | A | 0.225 | SNRPx10  |
| rs6421775  | 1  | 202101338 | 2.56x10 <sup>-6</sup> | -0.028 | 0.006 | A | 0.226 | SNRPx10  |
| rs6702750  | 1  | 202108915 | 2.59x10 <sup>-6</sup> | -0.029 | 0.006 | C | 0.222 | SNRPx10  |
| rs6697629  | 1  | 202099734 | 2.71x10 <sup>-6</sup> | -0.028 | 0.006 | T | 0.226 | SNRPx10  |
| rs4951274  | 1  | 202096164 | 2.71x10 <sup>-6</sup> | -0.028 | 0.006 | A | 0.227 | SNRPx10  |
| rs6664617  | 1  | 202109044 | 2.82x10 <sup>-6</sup> | -0.028 | 0.006 | T | 0.222 | SNRPx10  |
| rs4598553  | 1  | 202106660 | 2.82x10 <sup>-6</sup> | -0.028 | 0.006 | C | 0.222 | SNRPx10  |
| rs2298870  | 1  | 202105896 | 2.84x10 <sup>-6</sup> | -0.028 | 0.006 | C | 0.223 | SNRPx10  |
| rs7542275  | 1  | 202104832 | 2.86x10 <sup>-6</sup> | -0.028 | 0.006 | C | 0.223 | SNRPx10  |
| rs11590770 | 1  | 202102354 | 2.89x10 <sup>-6</sup> | -0.028 | 0.006 | A | 0.225 | SNRPx10  |
| rs4951031  | 1  | 202096179 | 2.94x10 <sup>-6</sup> | -0.028 | 0.006 | G | 0.228 | SNRPx10  |
| rs4951275  | 1  | 202096642 | 2.97x10 <sup>-6</sup> | -0.028 | 0.006 | G | 0.227 | SNRPx10  |
| rs12212795 | 6  | 118761001 | 3.48x10 <sup>-6</sup> | -0.054 | 0.012 | C | 0.058 | SLC35F1  |
| rs12210810 | 6  | 118759897 | 3.48x10 <sup>-6</sup> | -0.054 | 0.012 | C | 0.058 | SLC35F1  |

|            |    |           |           |        |       |   |       |          |
|------------|----|-----------|-----------|--------|-------|---|-------|----------|
| rs4604758  | 1  | 202109147 | 3.60x10-6 | -0.028 | 0.006 | C | 0.222 | SNRPx10  |
| rs12771324 | 10 | 96364911  | 3.73x10-6 | 0.108  | 0.023 | T | 0.021 | Hx10LLS  |
| rs1532222  | 7  | 128304181 | 3.90x10-6 | -0.034 | 0.007 | T | 0.167 | ATP6V1F  |
| rs4749460  | 10 | 29902974  | 4.09x10-6 | -0.046 | 0.010 | A | 0.080 | SVIL     |
| rs7786074  | 7  | 128307527 | 4.09x10-6 | -0.034 | 0.007 | T | 0.214 | ATP6V1F  |
| rs10826661 | 10 | 29902440  | 4.48x10-6 | -0.046 | 0.010 | G | 0.080 | SVIL     |
| rs7899653  | 10 | 29901907  | 4.57x10-6 | -0.046 | 0.010 | A | 0.080 | SVIL     |
| rs12199837 | 6  | 119037337 | 4.65x10-6 | -0.049 | 0.011 | A | 0.074 | C6orf204 |
| rs6702792  | 1  | 202112581 | 4.83x10-6 | -0.028 | 0.006 | A | 0.222 | SNRPx10  |
| rs11007656 | 10 | 29897704  | 4.91x10-6 | -0.045 | 0.010 | G | 0.080 | SVIL     |
| rs6593980  | 1  | 202110365 | 4.96x10-6 | -0.028 | 0.006 | A | 0.223 | SNRPx10  |
| rs11606985 | 11 | 2800252   | 4.96x10-6 | 0.035  | 0.008 | C | 0.244 | KCNQ1    |
| rs11240612 | 1  | 202112172 | 5.07x10-6 | -0.028 | 0.006 | C | 0.222 | SNRPx10  |
| rs6701012  | 1  | 202113219 | 5.09x10-6 | -0.028 | 0.006 | C | 0.222 | SNRPx10  |
| rs16915456 | 9  | 29952701  | 5.21x10-6 | 0.033  | 0.007 | T | 0.149 | LINGO2   |
| rs2253959  | 4  | 7755718   | 5.83x10-6 | 0.026  | 0.006 | T | 0.286 | SORCS2   |
| rs12215355 | 6  | 118787245 | 6.09x10-6 | -0.053 | 0.012 | C | 0.057 | SLC35F1  |
| rs1005256  | 7  | 15006130  | 6.09x10-6 | 0.025  | 0.005 | C | 0.382 | DGKB     |
| rs1977386  | 10 | 29892728  | 6.16x10-6 | -0.045 | 0.010 | A | 0.077 | SVIL     |
| rs6752756  | 2  | 179449350 | 6.43x10-6 | -0.048 | 0.011 | T | 0.066 | CCDC141  |
| rs16915458 | 9  | 29953072  | 6.44x10-6 | 0.033  | 0.007 | G | 0.146 | LINGO2   |
| rs945868   | 1  | 80945616  | 6.62x10-6 | -0.025 | 0.006 | C | 0.365 | LPHN2    |
| rs1361098  | 1  | 80944529  | 6.67x10-6 | -0.025 | 0.006 | G | 0.365 | LPHN2    |
| rs12255867 | 10 | 29907113  | 6.68x10-6 | -0.045 | 0.010 | G | 0.077 | SVIL     |
| rs11576057 | 1  | 202053897 | 6.72x10-6 | -0.029 | 0.006 | A | 0.202 | ZC3H11A  |
| rs17701520 | 9  | 29952872  | 6.80x10-6 | 0.033  | 0.007 | A | 0.146 | LINGO2   |
| rs12619308 | 2  | 179437515 | 6.88x10-6 | -0.047 | 0.011 | T | 0.068 | CCDC141  |
| rs6675962  | 1  | 80947893  | 6.98x10-6 | -0.025 | 0.006 | G | 0.365 | LPHN2    |
| rs4878421  | 9  | 29951233  | 6.99x10-6 | 0.033  | 0.007 | G | 0.148 | LINGO2   |
| rs17774158 | 9  | 29952398  | 7.25x10-6 | 0.033  | 0.007 | C | 0.149 | LINGO2   |
| rs11756440 | 6  | 119100335 | 7.45x10-6 | 0.023  | 0.005 | A | 0.466 | C6orf204 |
| rs7762823  | 6  | 118663228 | 7.50x10-6 | -0.024 | 0.005 | G | 0.422 | SLC35F1  |

|            |    |           |           |        |       |   |       |          |
|------------|----|-----------|-----------|--------|-------|---|-------|----------|
| rs11756438 | 6  | 119100325 | 7.54x10-6 | 0.023  | 0.005 | A | 0.465 | C6orf204 |
| rs17774136 | 9  | 29952346  | 7.74x10-6 | 0.033  | 0.007 | A | 0.148 | LINGO2   |
| rs13299889 | 9  | 29952125  | 7.92x10-6 | 0.033  | 0.007 | C | 0.148 | LINGO2   |
| rs4945348  | 11 | 78797081  | 8.30x10-6 | -0.033 | 0.007 | C | 0.136 | ODZ4     |
| rs10457327 | 6  | 118798845 | 8.41x10-6 | -0.052 | 0.012 | C | 0.061 | SLC35F1  |
| rs10511836 | 9  | 29950545  | 8.44x10-6 | 0.033  | 0.007 | T | 0.149 | LINGO2   |
| rs7027471  | 9  | 29954976  | 8.60x10-6 | 0.032  | 0.007 | T | 0.143 | LINGO2   |
| rs4677899  | 3  | 124897007 | 8.83x10-6 | 0.119  | 0.027 | A | 0.012 | MYLK     |
| rs1869866  | 3  | 124895938 | 8.97x10-6 | 0.119  | 0.027 | A | 0.012 | MYLK     |
| rs546929   | 9  | 29628167  | 9.08x10-6 | 0.044  | 0.010 | T | 0.082 | LINGO2   |
| rs3733989  | 5  | 167622795 | 9.42x10-6 | -0.026 | 0.006 | A | 0.302 | ODZ2     |
| rs4403497  | 9  | 29950458  | 9.67x10-6 | 0.032  | 0.007 | A | 0.150 | LINGO2   |

**eTable 6. SNPs Associated With LV Wall Thickness With  $P$  Value  $<10^{-5}$** 

| SNP        | chromosome | position  | meta-analysis P-value | meta-analysis beta | meta-analysis SE | coded allele | allele frequency | Nearest Gene |
|------------|------------|-----------|-----------------------|--------------------|------------------|--------------|------------------|--------------|
| rs7910620  | 10         | 87836939  | 5.62x10 <sup>-9</sup> | 0.165245257        | 0.028354833      | G            | 0.008994159      | GRID1        |
| rs2059238  | 16         | 76816311  | 1.89x10 <sup>-7</sup> | -0.019719424       | 0.003785172      | A            | 0.224243496      | WVOX         |
| rs17132261 | 5          | 110036113 | 3.36x10 <sup>-7</sup> | 0.060132778        | 0.011785919      | T            | 0.014548744      | SLC25A46     |
| rs17132250 | 5          | 110022562 | 3.42x10 <sup>-7</sup> | 0.059134182        | 0.011598403      | A            | 0.014948811      | SLC25A46     |
| rs17132292 | 5          | 110065983 | 3.64x10 <sup>-7</sup> | 0.0627422          | 0.012333545      | C            | 0.014385766      | SLC25A46     |
| rs13205800 | 6          | 49745560  | 1.10x10 <sup>-6</sup> | 0.017970859        | 0.003687574      | C            | 0.20979031       | CRISP2       |
| rs12518142 | 5          | 109664484 | 1.26x10 <sup>-6</sup> | 0.044330417        | 0.009147131      | T            | 0.039318338      | MAN2A1       |
| rs1533013  | 5          | 171950809 | 2.85x10 <sup>-6</sup> | 0.048244832        | 0.010306166      | G            | 0.021801132      | SH3PXD2B     |
| rs7669852  | 4          | 77761422  | 2.87x10 <sup>-6</sup> | -0.013495965       | 0.00288364       | A            | 0.360930117      | SHROOM3      |
| rs4802577  | 19         | 54353652  | 3.00x10 <sup>-6</sup> | -0.044009477       | 0.009422855      | A            | 0.063942136      | TRPM4        |
| rs9896894  | 17         | 61944232  | 3.17x10 <sup>-6</sup> | 0.013984965        | 0.003001363      | T            | 0.340114272      | PRKCA        |
| rs17132193 | 5          | 109892382 | 3.26x10 <sup>-6</sup> | 0.053079015        | 0.011405621      | C            | 0.015907479      | SLC25A46     |
| rs4957904  | 5          | 109901920 | 3.34x10 <sup>-6</sup> | 0.053147091        | 0.011431986      | T            | 0.016079691      | SLC25A46     |
| rs10204096 | 2          | 46737243  | 3.57x10 <sup>-6</sup> | 0.013175789        | 0.002842772      | T            | 0.408079175      | CRIP1        |
| rs12515045 | 5          | 109832876 | 3.61x10 <sup>-6</sup> | 0.052626633        | 0.011360603      | G            | 0.015781895      | SLC25A46     |
| rs4305421  | 3          | 134176232 | 4.51x10 <sup>-6</sup> | 0.013039938        | 0.002843061      | A            | 0.399695484      | TMEM108      |
| rs11755355 | 6          | 49741713  | 4.57x10 <sup>-6</sup> | 0.014992041        | 0.003270795      | T            | 0.270389587      | CRISP2       |
| rs10179861 | 2          | 46736706  | 5.08x10 <sup>-6</sup> | 0.013032462        | 0.002857165      | T            | 0.407355952      | CRIP1        |
| rs12513391 | 5          | 109802271 | 5.15x10 <sup>-6</sup> | 0.053079542        | 0.011644156      | T            | 0.015749429      | SLC25A46     |
| rs10203903 | 2          | 46737034  | 5.43x10 <sup>-6</sup> | 0.012994289        | 0.002857437      | T            | 0.407146173      | CRIP1        |
| rs8125881  | 20         | 50077919  | 5.80x10 <sup>-6</sup> | 0.026041748        | 0.005744159      | A            | 0.152184855      | ZFP64        |
| rs13205275 | 6          | 49745061  | 6.71x10 <sup>-6</sup> | 0.014084422        | 0.003127901      | T            | 0.283501317      | CRISP2       |
| rs11752738 | 6          | 49744677  | 6.77x10 <sup>-6</sup> | 0.014082666        | 0.003128897      | T            | 0.283641937      | CRISP2       |
| rs9305525  | 21         | 15290518  | 7.09x10 <sup>-6</sup> | 0.169193305        | 0.03767495       | T            | 0.008268698      | NRIP1        |
| rs13200858 | 6          | 49744088  | 7.30x10 <sup>-6</sup> | 0.014040957        | 0.003130921      | G            | 0.282827192      | CRISP2       |
| rs11653643 | 17         | 61946193  | 7.35x10 <sup>-6</sup> | 0.013146091        | 0.002932148      | A            | 0.344850431      | PRKCA        |
| rs11759936 | 6          | 49741349  | 7.40x10 <sup>-6</sup> | 0.014034213        | 0.003131258      | A            | 0.282389483      | CRISP2       |
| rs3733246  | 4          | 77755805  | 7.43x10 <sup>-6</sup> | -0.013205772       | 0.002946981      | C            | 0.354771441      | SHROOM3      |



|            |    |           |           |             |             |   |             |          |
|------------|----|-----------|-----------|-------------|-------------|---|-------------|----------|
| rs13193433 | 6  | 49742848  | 7.45x10-6 | 0.014030643 | 0.003131649 | G | 0.281880012 | CRISP2   |
| rs12520182 | 5  | 109797609 | 7.56x10-6 | 0.052383305 | 0.011700061 | C | 0.015609954 | SLC25A46 |
| rs751722   | 20 | 59126678  | 7.66x10-6 | 0.016434879 | 0.003672958 | G | 0.164892055 | CDH4     |
| rs12527781 | 6  | 49743411  | 7.68x10-6 | 0.014009639 | 0.003131359 | G | 0.282939686 | CRISP2   |
| rs6071498  | 20 | 59129793  | 7.80x10-6 | 0.01647222  | 0.003684601 | C | 0.167107866 | CDH4     |
| rs10948521 | 6  | 49741201  | 7.93x10-6 | 0.013990759 | 0.003132027 | A | 0.282373256 | CRISP2   |
| rs1407112  | 6  | 49749455  | 8.12x10-6 | 0.014170037 | 0.003175665 | T | 0.277872003 | CRISP2   |
| rs13213036 | 6  | 49750465  | 8.24x10-6 | 0.014161075 | 0.003175893 | A | 0.277805037 | CRISP2   |
| rs17572279 | 6  | 49727047  | 8.43x10-6 | 0.013787977 | 0.003095639 | A | 0.286274724 | RHAG     |
| rs11759109 | 6  | 49729670  | 8.56x10-6 | 0.013832084 | 0.003107873 | T | 0.284139017 | RHAG     |
| rs11752255 | 6  | 49729488  | 8.71x10-6 | 0.013752334 | 0.003092501 | C | 0.285871564 | RHAG     |
| rs12528363 | 6  | 49739130  | 8.86x10-6 | 0.013918486 | 0.003132436 | G | 0.282364607 | RHAG     |
| rs2369953  | 3  | 134169915 | 9.00x10-6 | 0.012784641 | 0.002879449 | A | 0.396040243 | TMEM108  |
| rs2104003  | 20 | 59125863  | 9.07x10-6 | 0.016342434 | 0.003682276 | G | 0.164740241 | CDH4     |
| rs12526795 | 6  | 49739053  | 9.15x10-6 | 0.013896298 | 0.00313231  | C | 0.282458888 | RHAG     |
| rs13198479 | 6  | 49738551  | 9.27x10-6 | 0.013883712 | 0.003131506 | G | 0.282388194 | RHAG     |
| rs13198350 | 6  | 49738488  | 9.31x10-6 | 0.013877452 | 0.003130773 | G | 0.282600703 | RHAG     |
| rs13198297 | 6  | 49738239  | 9.36x10-6 | 0.013869873 | 0.003129891 | T | 0.282754879 | RHAG     |
| rs13206923 | 6  | 49733210  | 9.43x10-6 | 0.013809877 | 0.003117438 | C | 0.282838591 | RHAG     |
| rs3763082  | 5  | 109751374 | 9.60x10-6 | 0.05169222  | 0.011679431 | A | 0.014481914 | SLC25A46 |
| rs13207716 | 6  | 49733694  | 9.78x10-6 | 0.013791154 | 0.003118799 | T | 0.28267577  | RHAG     |
| rs13207529 | 6  | 49733371  | 9.78x10-6 | 0.013788277 | 0.003118188 | A | 0.282756878 | RHAG     |
| rs2244497  | 17 | 61931405  | 9.82x10-6 | 0.01304065  | 0.002949641 | C | 0.345579749 | PRKCA    |
| rs4957906  | 5  | 109989362 | 9.82x10-6 | 0.051195592 | 0.01158008  | C | 0.015698344 | SLC25A46 |
|            |    |           |           |             |             |   |             |          |

**eTable 7. SNPs Associated With LV Systolic Dysfunction With *P* Value <10<sup>-5</sup>**

| SNP        | chromosome | position  | meta-analysis P-value | meta-analysis beta | meta-analysis SE | coded allele | allele frequency | Nearest Gene |
|------------|------------|-----------|-----------------------|--------------------|------------------|--------------|------------------|--------------|
| rs2235487  | 16         | 1670312   | 1.98x10 <sup>-7</sup> | -0.382             | 0.073            | G            | 0.218            | HN1L         |
| rs9305048  | 19         | 14740034  | 8.28x10 <sup>-7</sup> | 0.273              | 0.055            | G            | 0.443            | EMR2         |
| rs10501569 | 11         | 83931222  | 1.36x10 <sup>-6</sup> | 0.449              | 0.093            | T            | 0.088            | DLG2         |
| rs17807706 | 11         | 83931002  | 1.37x10 <sup>-6</sup> | 0.430              | 0.089            | G            | 0.087            | DLG2         |
| rs17807689 | 11         | 83930695  | 1.47x10 <sup>-6</sup> | 0.450              | 0.093            | G            | 0.089            | DLG2         |
| rs7998746  | 13         | 111948132 | 3.18x10 <sup>-6</sup> | 0.358              | 0.077            | T            | 0.117            | C13orf28     |
| rs9549896  | 13         | 111945704 | 3.40x10 <sup>-6</sup> | 0.359              | 0.077            | T            | 0.117            | C13orf28     |
| rs7319673  | 13         | 111944706 | 3.43x10 <sup>-6</sup> | 0.359              | 0.077            | T            | 0.117            | C13orf28     |
| rs1178436  | 16         | 1771654   | 3.84x10 <sup>-6</sup> | -0.356             | 0.077            | T            | 0.187            | SPSB3        |
| rs12144022 | 1          | 20049195  | 3.87x10 <sup>-6</sup> | 0.620              | 0.134            | T            | 0.047            | OTUD3        |
| rs12136562 | 1          | 20050255  | 3.90x10 <sup>-6</sup> | 0.620              | 0.134            | A            | 0.047            | OTUD3        |
| rs16858853 | 1          | 231408843 | 4.37x10 <sup>-6</sup> | 0.360              | 0.078            | T            | 0.122            | PCNXL2       |
| rs7986113  | 13         | 111948574 | 4.39x10 <sup>-6</sup> | 0.361              | 0.079            | G            | 0.115            | C13orf28     |
| rs17120882 | 13         | 111951242 | 4.50x10 <sup>-6</sup> | 0.361              | 0.079            | A            | 0.115            | C13orf28     |
| rs17120885 | 13         | 111951360 | 4.80x10 <sup>-6</sup> | 0.361              | 0.079            | G            | 0.114            | C13orf28     |
| rs344359   | 16         | 1778641   | 6.07x10 <sup>-6</sup> | -0.369             | 0.082            | T            | 0.173            | NUBP2        |
| rs7967910  | 12         | 31978798  | 7.02x10 <sup>-6</sup> | -0.365             | 0.081            | C            | 0.202            | C12orf35     |
| rs16854429 | 1          | 177876212 | 7.07x10 <sup>-6</sup> | 0.303              | 0.067            | T            | 0.221            | TDRD5        |
| rs1065663  | 16         | 1779024   | 8.22x10 <sup>-6</sup> | -0.361             | 0.081            | G            | 0.177            | NUBP2        |
| rs13278261 | 8          | 16197654  | 8.52x10 <sup>-6</sup> | 0.514              | 0.115            | A            | 0.048            | MSR1         |
| rs11739138 | 5          | 28122573  | 8.67x10 <sup>-6</sup> | 0.443              | 0.100            | G            | 0.071            | CDH9         |
| rs16858843 | 1          | 231405943 | 8.79x10 <sup>-6</sup> | 0.337              | 0.076            | C            | 0.128            | PCNXL2       |
| rs7989236  | 13         | 111953742 | 9.05x10 <sup>-6</sup> | 0.343              | 0.077            | T            | 0.126            | C13orf28     |
| rs12432019 | 14         | 55248459  | 9.52x10 <sup>-6</sup> | 0.385              | 0.087            | C            | 0.094            | KTN1         |
| rs12431962 | 14         | 55248246  | 9.54x10 <sup>-6</sup> | 0.386              | 0.087            | A            | 0.094            | KTN1         |
| rs11621130 | 14         | 55251053  | 9.79x10 <sup>-6</sup> | 0.384              | 0.087            | T            | 0.094            | KTN1         |
|            |            |           |                       |                    |                  |              |                  |              |

**eTable 8. SNPs Associated With Aortic Root With  $P$  Value  $<10^{-5}$** 

| SNP        | chromosome | position | meta-analysis P-value | meta-analysis beta | meta-analysis SE | coded allele | allele frequency | Nearest Gene |
|------------|------------|----------|-----------------------|--------------------|------------------|--------------|------------------|--------------|
| rs10852932 | 17         | 2090210  | 4.32E-11              | 0.031              | 0.005            | T            | 0.355            | SMG6         |
| rs216217   | 17         | 2091840  | 4.56E-11              | 0.031              | 0.005            | G            | 0.354            | SMG6         |
| rs12938295 | 17         | 2107604  | 5.07E-11              | 0.031              | 0.005            | A            | 0.354            | SMG6         |
| rs216193   | 17         | 2150203  | 5.77E-11              | 0.030              | 0.005            | A            | 0.377            | SMG6         |
| rs11078865 | 17         | 2055859  | 1.35E-10              | 0.030              | 0.005            | A            | 0.360            | SMG6         |
| rs216219   | 17         | 2094041  | 1.51E-10              | 0.029              | 0.005            | T            | 0.349            | SMG6         |
| rs12603592 | 17         | 2066568  | 1.53E-10              | 0.030              | 0.005            | T            | 0.346            | SMG6         |
| rs12943566 | 17         | 2104524  | 1.63E-10              | 0.029              | 0.005            | A            | 0.353            | SMG6         |
| rs1532292  | 17         | 2044233  | 1.65E-10              | 0.029              | 0.005            | G            | 0.381            | SMG6         |
| rs216223   | 17         | 2102698  | 1.70E-10              | 0.029              | 0.005            | C            | 0.353            | SMG6         |
| rs7213232  | 17         | 2112090  | 1.72E-10              | 0.029              | 0.005            | G            | 0.353            | SMG6         |
| rs1002135  | 17         | 2044333  | 1.74E-10              | 0.029              | 0.005            | G            | 0.381            | SMG6         |
| rs4523957  | 17         | 2155649  | 1.87E-10              | 0.031              | 0.005            | G            | 0.381            | SRR          |
| rs170044   | 17         | 2144252  | 2.02E-10              | 0.029              | 0.005            | G            | 0.351            | SMG6         |
| rs2281727  | 17         | 2064695  | 2.22E-10              | 0.029              | 0.005            | G            | 0.349            | SMG6         |
| rs177567   | 17         | 2144387  | 2.25E-10              | 0.029              | 0.005            | C            | 0.350            | SMG6         |
| rs216206   | 17         | 2142838  | 2.35E-10              | 0.029              | 0.005            | C            | 0.350            | SMG6         |
| rs216191   | 17         | 2135389  | 2.58E-10              | 0.029              | 0.005            | C            | 0.350            | SMG6         |
| rs8066372  | 17         | 2127718  | 2.61E-10              | 0.029              | 0.005            | G            | 0.348            | SMG6         |
| rs8074850  | 17         | 2134681  | 2.63E-10              | 0.029              | 0.005            | A            | 0.350            | SMG6         |
| rs8065650  | 17         | 2127573  | 2.64E-10              | 0.029              | 0.005            | T            | 0.348            | SMG6         |
| rs9905529  | 17         | 2124482  | 2.71E-10              | 0.029              | 0.005            | C            | 0.351            | SMG6         |
| rs216183   | 17         | 2120673  | 2.73E-10              | 0.029              | 0.005            | A            | 0.352            | SMG6         |
| rs11657644 | 17         | 2121960  | 2.75E-10              | 0.029              | 0.005            | C            | 0.352            | SMG6         |
| rs216190   | 17         | 2134207  | 2.78E-10              | 0.029              | 0.005            | C            | 0.350            | SMG6         |
| rs7217687  | 17         | 2045022  | 2.84E-10              | 0.029              | 0.005            | C            | 0.374            | SMG6         |
| rs216189   | 17         | 2134151  | 2.90E-10              | 0.029              | 0.005            | G            | 0.350            | SMG6         |
| rs9895551  | 17         | 2062672  | 2.93E-10              | 0.029              | 0.005            | G            | 0.348            | SMG6         |

|            |    |         |           |       |       |   |       |      |
|------------|----|---------|-----------|-------|-------|---|-------|------|
| rs11651451 | 17 | 2045167 | 3.19E-10  | 0.029 | 0.005 | T | 0.373 | SMG6 |
| rs749240   | 17 | 2132850 | 3.25E-10  | 0.029 | 0.005 | T | 0.351 | SMG6 |
| rs216172   | 17 | 2073254 | 3.38E-10  | 0.030 | 0.005 | C | 0.347 | SMG6 |
| rs143499   | 17 | 2079074 | 3.41E-10  | 0.030 | 0.005 | T | 0.347 | SMG6 |
| rs11078883 | 17 | 2085578 | 3.62E-10  | 0.029 | 0.005 | G | 0.348 | SMG6 |
| rs2169357  | 17 | 2043191 | 3.63E-10  | 0.029 | 0.005 | T | 0.357 | SMG6 |
| rs9906500  | 17 | 2075960 | 3.94E-10  | 0.029 | 0.005 | A | 0.352 | SMG6 |
| rs7217226  | 17 | 2082815 | 4.32E-10  | 0.029 | 0.005 | G | 0.339 | SMG6 |
| rs7212249  | 17 | 2082730 | 4.66E-10  | 0.029 | 0.005 | T | 0.339 | SMG6 |
| rs11655813 | 17 | 2065851 | 4.68E-10  | 0.030 | 0.005 | T | 0.352 | SMG6 |
| rs4790885  | 17 | 2055328 | 5.15E-10  | 0.029 | 0.005 | A | 0.343 | SMG6 |
| rs8076939  | 17 | 2046681 | 5.52E-10  | 0.029 | 0.005 | A | 0.347 | SMG6 |
| rs6503324  | 17 | 2047262 | 5.52E-10  | 0.029 | 0.005 | A | 0.347 | SMG6 |
| rs9913504  | 17 | 2048995 | 5.54E-10  | 0.029 | 0.005 | T | 0.346 | SMG6 |
| rs1231209  | 17 | 2071722 | 5.69E-10  | 0.029 | 0.005 | A | 0.345 | SMG6 |
| rs1231206  | 17 | 2072355 | 5.78E-10  | 0.029 | 0.005 | A | 0.346 | SMG6 |
| rs12602764 | 17 | 2069950 | 8.15E-10  | 0.029 | 0.005 | T | 0.345 | SMG6 |
| rs2760736  | 17 | 1983403 | 1.30x10-9 | 0.031 | 0.005 | G | 0.280 | SMG6 |
| rs7503141  | 17 | 1991395 | 1.32x10-9 | 0.031 | 0.005 | C | 0.279 | SMG6 |
| rs9894215  | 17 | 2017448 | 1.44x10-9 | 0.030 | 0.005 | A | 0.279 | SMG6 |
| rs1565763  | 17 | 2002050 | 2.09x10-9 | 0.030 | 0.005 | C | 0.279 | SMG6 |
| rs903159   | 17 | 2001859 | 2.14x10-9 | 0.030 | 0.005 | T | 0.279 | SMG6 |
| rs9913789  | 17 | 1997195 | 2.21x10-9 | 0.030 | 0.005 | C | 0.279 | SMG6 |
| rs6503293  | 17 | 1995361 | 2.35x10-9 | 0.030 | 0.005 | A | 0.278 | SMG6 |
| rs923862   | 17 | 1978132 | 2.38x10-9 | 0.029 | 0.005 | C | 0.279 | SMG6 |
| rs2760745  | 17 | 1982341 | 2.41x10-9 | 0.030 | 0.005 | C | 0.278 | SMG6 |
| rs2641444  | 17 | 1984152 | 2.42x10-9 | 0.030 | 0.005 | C | 0.278 | SMG6 |
| rs9909515  | 17 | 1986483 | 2.42x10-9 | 0.030 | 0.005 | C | 0.278 | SMG6 |
| rs4349181  | 17 | 1987713 | 2.42x10-9 | 0.030 | 0.005 | G | 0.278 | SMG6 |
| rs923864   | 17 | 1978257 | 2.43x10-9 | 0.030 | 0.005 | T | 0.279 | SMG6 |
| rs7212589  | 17 | 1989143 | 2.48x10-9 | 0.030 | 0.005 | G | 0.278 | SMG6 |
| rs2984943  | 17 | 1976885 | 2.69x10-9 | 0.030 | 0.005 | C | 0.276 | SMG6 |

|            |    |          |           |        |       |   |       |       |
|------------|----|----------|-----------|--------|-------|---|-------|-------|
| rs2984942  | 17 | 1976905  | 2.72x10-9 | 0.030  | 0.005 | C | 0.276 | SMG6  |
| rs923863   | 17 | 1978137  | 2.80x10-9 | 0.029  | 0.005 | G | 0.279 | SMG6  |
| rs2641440  | 17 | 1973932  | 3.21x10-9 | 0.030  | 0.005 | C | 0.277 | SMG6  |
| rs2172593  | 17 | 1972294  | 3.28x10-9 | 0.030  | 0.005 | C | 0.277 | SMG6  |
| rs9894613  | 17 | 2017808  | 4.47x10-9 | 0.029  | 0.005 | T | 0.292 | SMG6  |
| rs9900587  | 17 | 2017847  | 4.72x10-9 | 0.029  | 0.005 | A | 0.272 | SMG6  |
| rs391300   | 17 | 2163008  | 4.77x10-9 | 0.029  | 0.005 | T | 0.364 | SRR   |
| rs7214741  | 17 | 2032348  | 5.08x10-9 | 0.029  | 0.005 | A | 0.290 | SMG6  |
| rs2270478  | 17 | 2036598  | 5.59x10-9 | 0.029  | 0.005 | A | 0.311 | SMG6  |
| rs7212964  | 17 | 2006069  | 6.11x10-9 | 0.029  | 0.005 | T | 0.291 | SMG6  |
| rs7219693  | 17 | 2007851  | 6.35x10-9 | 0.028  | 0.005 | A | 0.290 | SMG6  |
| rs8082485  | 17 | 2007157  | 6.35x10-9 | 0.028  | 0.005 | G | 0.290 | SMG6  |
| rs4790315  | 17 | 2017279  | 6.39x10-9 | 0.028  | 0.005 | C | 0.290 | SMG6  |
| rs7220685  | 17 | 2006135  | 6.45x10-9 | 0.028  | 0.005 | G | 0.291 | SMG6  |
| rs2131702  | 17 | 1972208  | 6.63x10-9 | 0.029  | 0.005 | C | 0.279 | SMG6  |
| rs9898819  | 17 | 2023102  | 7.79x10-9 | 0.028  | 0.005 | A | 0.289 | SMG6  |
| rs898748   | 17 | 2032225  | 7.87x10-9 | 0.028  | 0.005 | T | 0.291 | SMG6  |
| rs1994883  | 17 | 2030631  | 7.88x10-9 | 0.028  | 0.005 | A | 0.293 | SMG6  |
| rs7543130  | 1  | 99822373 | 8.08x10-9 | 0.026  | 0.004 | A | 0.488 | PALMD |
| rs898749   | 17 | 2031935  | 8.20x10-9 | 0.028  | 0.005 | A | 0.290 | SMG6  |
| rs7212342  | 17 | 2031055  | 8.27x10-9 | 0.028  | 0.005 | G | 0.291 | SMG6  |
| rs9892754  | 17 | 2031315  | 8.32x10-9 | 0.028  | 0.005 | T | 0.290 | SMG6  |
| rs1994884  | 17 | 2030758  | 8.38x10-9 | 0.028  | 0.005 | A | 0.291 | SMG6  |
| rs903161   | 17 | 2038756  | 8.96x10-9 | 0.028  | 0.005 | T | 0.307 | SMG6  |
| rs11078856 | 17 | 2038814  | 9.36x10-9 | 0.028  | 0.005 | A | 0.308 | SMG6  |
| rs2307143  | 17 | 2036504  | 9.41x10-9 | 0.028  | 0.005 | A | 0.307 | SMG6  |
| rs1563966  | 17 | 2042704  | 9.88x10-9 | 0.028  | 0.005 | A | 0.326 | SMG6  |
| rs7219557  | 17 | 2032950  | 1.08x10-8 | 0.029  | 0.005 | A | 0.288 | SMG6  |
| rs903160   | 17 | 2038515  | 1.09x10-8 | 0.028  | 0.005 | T | 0.307 | SMG6  |
| rs903162   | 17 | 2038950  | 1.11x10-8 | 0.028  | 0.005 | A | 0.297 | SMG6  |
| rs7543039  | 1  | 99822236 | 1.11x10-8 | -0.025 | 0.004 | C | 0.500 | PALMD |
| rs6702619  | 1  | 99818834 | 1.11x10-8 | -0.025 | 0.004 | T | 0.500 | PALMD |

|            |    |           |           |        |       |   |       |         |
|------------|----|-----------|-----------|--------|-------|---|-------|---------|
| rs11166276 | 1  | 99817827  | 1.14x10-8 | -0.025 | 0.004 | C | 0.500 | PALMD   |
| rs2760743  | 17 | 1963829   | 1.24x10-8 | 0.028  | 0.005 | A | 0.288 | SMG6    |
| rs4790070  | 17 | 2104844   | 1.25x10-8 | 0.029  | 0.005 | C | 0.254 | SMG6    |
| rs2957926  | 17 | 1970780   | 1.25x10-8 | 0.028  | 0.005 | T | 0.288 | SMG6    |
| rs2760739  | 17 | 1970967   | 1.25x10-8 | 0.028  | 0.005 | T | 0.288 | SMG6    |
| rs2760740  | 17 | 1967739   | 1.26x10-8 | 0.028  | 0.005 | C | 0.288 | SMG6    |
| rs2641438  | 17 | 1964536   | 1.28x10-8 | 0.028  | 0.005 | G | 0.289 | SMG6    |
| rs2641439  | 17 | 1964311   | 1.28x10-8 | 0.028  | 0.005 | G | 0.289 | SMG6    |
| rs11867782 | 17 | 2037257   | 1.33x10-8 | 0.028  | 0.005 | G | 0.282 | SMG6    |
| rs11078855 | 17 | 2038058   | 1.33x10-8 | 0.028  | 0.005 | T | 0.282 | SMG6    |
| rs2760741  | 17 | 1967193   | 1.37x10-8 | 0.028  | 0.005 | T | 0.288 | SMG6    |
| rs17470137 | 5  | 122559246 | 1.63x10-8 | 0.029  | 0.005 | A | 0.287 | CCDC100 |
| rs17469907 | 5  | 122556319 | 1.73x10-8 | 0.029  | 0.005 | G | 0.284 | CCDC100 |
| rs1890753  | 1  | 99812107  | 1.74x10-8 | -0.026 | 0.005 | G | 0.490 | PALMD   |
| rs9910849  | 17 | 2122518   | 2.10x10-8 | 0.029  | 0.005 | T | 0.254 | SMG6    |
| rs170040   | 17 | 2112464   | 2.48x10-8 | 0.030  | 0.005 | C | 0.228 | SMG6    |
| rs7225168  | 17 | 1969839   | 2.66x10-8 | 0.028  | 0.005 | G | 0.293 | SMG6    |
| rs216205   | 17 | 2142900   | 3.10x10-8 | 0.028  | 0.005 | C | 0.253 | SMG6    |
| rs2273984  | 17 | 2086404   | 3.17x10-8 | 0.028  | 0.005 | C | 0.336 | SMG6    |
| rs7213756  | 17 | 2045089   | 4.87x10-8 | 0.027  | 0.005 | A | 0.312 | SMG6    |
| rs337101   | 5  | 122578545 | 5.05x10-8 | 0.028  | 0.005 | C | 0.291 | CCDC100 |
| rs6693824  | 1  | 99826185  | 5.21x10-8 | -0.025 | 0.005 | G | 0.407 | PALMD   |
| rs2984941  | 17 | 1978293   | 5.38x10-8 | 0.027  | 0.005 | G | 0.281 | SMG6    |
| rs170043   | 17 | 2147184   | 5.97x10-8 | 0.029  | 0.005 | A | 0.226 | SMG6    |
| rs216184   | 17 | 2121020   | 6.13x10-8 | 0.029  | 0.005 | T | 0.227 | SMG6    |
| rs9899330  | 17 | 2132577   | 6.74x10-8 | 0.029  | 0.005 | A | 0.227 | SMG6    |
| rs4026608  | 12 | 64680931  | 7.30x10-8 | -0.026 | 0.005 | C | 0.378 | HMGA2   |
| rs2641431  | 17 | 1977257   | 9.31x10-8 | 0.032  | 0.006 | G | 0.177 | SMG6    |
| rs216196   | 17 | 2149693   | 1.12x10-7 | -0.027 | 0.005 | C | 0.269 | SMG6    |
| rs7979034  | 12 | 64695982  | 1.23x10-7 | -0.025 | 0.005 | A | 0.362 | HMGA2   |
| rs1871675  | 12 | 64697959  | 1.28x10-7 | -0.025 | 0.005 | G | 0.362 | HMGA2   |
| rs17608766 | 17 | 42368270  | 1.43x10-7 | 0.038  | 0.007 | C | 0.132 | GOSR2   |

|            |    |           |                       |        |       |   |       |         |
|------------|----|-----------|-----------------------|--------|-------|---|-------|---------|
| rs899844   | 12 | 64685200  | 1.60x10 <sup>-7</sup> | -0.024 | 0.005 | A | 0.365 | HMGA2   |
| rs10878359 | 12 | 64690891  | 1.66x10 <sup>-7</sup> | -0.024 | 0.005 | T | 0.365 | HMGA2   |
| rs2760751  | 17 | 1974856   | 2.14x10 <sup>-7</sup> | -0.027 | 0.005 | A | 0.267 | SMG6    |
| rs337099   | 5  | 122574232 | 2.15x10 <sup>-7</sup> | 0.025  | 0.005 | C | 0.341 | CCDC100 |
| rs10770612 | 12 | 20121906  | 2.40x10 <sup>-7</sup> | 0.035  | 0.007 | G | 0.194 | PDE3A   |
| rs8077194  | 17 | 2066225   | 2.50x10 <sup>-7</sup> | -0.026 | 0.005 | A | 0.265 | SMG6    |
| rs434775   | 5  | 122576893 | 2.67x10 <sup>-7</sup> | 0.024  | 0.005 | T | 0.339 | CCDC100 |
| rs1000792  | 1  | 99812688  | 2.72x10 <sup>-7</sup> | -0.037 | 0.007 | G | 0.164 | PALMD   |
| rs2126202  | 17 | 2042462   | 3.04x10 <sup>-7</sup> | 0.023  | 0.005 | C | 0.466 | SMG6    |
| rs1644316  | 5  | 122559278 | 3.28x10 <sup>-7</sup> | 0.024  | 0.005 | T | 0.334 | CCDC100 |
| rs413016   | 17 | 2184211   | 3.34x10 <sup>-7</sup> | 0.028  | 0.005 | T | 0.255 | TSR1    |
| rs337086   | 5  | 122583400 | 3.55x10 <sup>-7</sup> | 0.025  | 0.005 | A | 0.336 | CCDC100 |
| rs1644317  | 5  | 122560768 | 3.61x10 <sup>-7</sup> | 0.024  | 0.005 | A | 0.334 | CCDC100 |
| rs216224   | 17 | 2103035   | 3.71x10 <sup>-7</sup> | -0.026 | 0.005 | C | 0.268 | SMG6    |
| rs1339860  | 1  | 99827387  | 3.78x10 <sup>-7</sup> | -0.023 | 0.005 | A | 0.405 | PALMD   |
| rs2038677  | 17 | 2124842   | 4.03x10 <sup>-7</sup> | -0.025 | 0.005 | C | 0.272 | SMG6    |
| rs893817   | 15 | 72016118  | 4.12x10 <sup>-7</sup> | 0.024  | 0.005 | G | 0.342 | LOXL1   |
| rs9902945  | 17 | 1994420   | 4.14x10 <sup>-7</sup> | 0.031  | 0.006 | C | 0.171 | SMG6    |
| rs11959350 | 5  | 122569338 | 4.16x10 <sup>-7</sup> | 0.024  | 0.005 | G | 0.333 | CCDC100 |
| rs216215   | 17 | 2087418   | 4.25x10 <sup>-7</sup> | -0.025 | 0.005 | C | 0.274 | SMG6    |
| rs2392041  | 1  | 99828813  | 4.30x10 <sup>-7</sup> | -0.023 | 0.005 | G | 0.353 | PALMD   |
| rs170041   | 17 | 2116966   | 4.32x10 <sup>-7</sup> | -0.025 | 0.005 | T | 0.267 | SMG6    |
| rs12374528 | 5  | 122569872 | 4.60x10 <sup>-7</sup> | 0.024  | 0.005 | A | 0.333 | CCDC100 |
| rs4581299  | 1  | 99808648  | 4.74x10 <sup>-7</sup> | -0.024 | 0.005 | A | 0.352 | PALMD   |
| rs2417823  | 12 | 20079358  | 4.98x10 <sup>-7</sup> | -0.025 | 0.005 | C | 0.276 | PDE3A   |
| rs2417822  | 12 | 20079410  | 5.00x10 <sup>-7</sup> | -0.025 | 0.005 | C | 0.277 | PDE3A   |
| rs10770609 | 12 | 20080888  | 5.13x10 <sup>-7</sup> | -0.024 | 0.005 | G | 0.277 | PDE3A   |
| rs2417821  | 12 | 20081535  | 5.26x10 <sup>-7</sup> | -0.024 | 0.005 | C | 0.277 | PDE3A   |
| rs9898390  | 17 | 2124234   | 5.33x10 <sup>-7</sup> | -0.025 | 0.005 | C | 0.271 | SMG6    |
| rs11658797 | 17 | 2035719   | 5.38x10 <sup>-7</sup> | -0.026 | 0.005 | T | 0.270 | SMG6    |
| rs2893418  | 1  | 99824256  | 5.38x10 <sup>-7</sup> | -0.023 | 0.005 | G | 0.351 | PALMD   |
| rs4306343  | 12 | 20081897  | 5.68x10 <sup>-7</sup> | -0.024 | 0.005 | A | 0.276 | PDE3A   |

|            |    |           |                       |        |       |   |       |          |
|------------|----|-----------|-----------------------|--------|-------|---|-------|----------|
| rs216182   | 17 | 2119813   | 5.76x10 <sup>-7</sup> | -0.025 | 0.005 | G | 0.271 | SMG6     |
| rs4790881  | 17 | 2015682   | 5.76x10 <sup>-7</sup> | -0.025 | 0.005 | C | 0.295 | SMG6     |
| rs4529947  | 12 | 20082343  | 5.80x10 <sup>-7</sup> | -0.024 | 0.005 | G | 0.276 | PDE3A    |
| rs7296393  | 12 | 95552674  | 5.90x10 <sup>-7</sup> | -0.128 | 0.026 | A | 0.020 | C12orf63 |
| rs4409914  | 12 | 20083167  | 5.94x10 <sup>-7</sup> | -0.024 | 0.005 | A | 0.276 | PDE3A    |
| rs7980003  | 12 | 20083537  | 6.08x10 <sup>-7</sup> | -0.024 | 0.005 | T | 0.275 | PDE3A    |
| rs3752728  | 12 | 20084239  | 6.16x10 <sup>-7</sup> | -0.024 | 0.005 | G | 0.275 | PDE3A    |
| rs10762771 | 10 | 53973455  | 6.26x10 <sup>-7</sup> | -0.042 | 0.009 | T | 0.139 | MBL2     |
| rs4762921  | 12 | 20075806  | 6.30x10 <sup>-7</sup> | -0.025 | 0.005 | G | 0.270 | PDE3A    |
| rs4762920  | 12 | 20075791  | 6.40x10 <sup>-7</sup> | -0.025 | 0.005 | G | 0.270 | PDE3A    |
| rs893820   | 15 | 72016656  | 6.43x10 <sup>-7</sup> | 0.024  | 0.005 | C | 0.328 | LOXL1    |
| rs4762745  | 12 | 20109468  | 6.62x10 <sup>-7</sup> | -0.024 | 0.005 | A | 0.296 | PDE3A    |
| rs893816   | 15 | 72015517  | 7.11x10 <sup>-7</sup> | 0.023  | 0.005 | T | 0.328 | LOXL1    |
| rs11657636 | 17 | 2000670   | 7.12x10 <sup>-7</sup> | -0.024 | 0.005 | C | 0.298 | SMG6     |
| rs7209460  | 17 | 1995463   | 7.33x10 <sup>-7</sup> | -0.024 | 0.005 | C | 0.298 | SMG6     |
| rs893818   | 15 | 72016248  | 7.51x10 <sup>-7</sup> | 0.023  | 0.005 | A | 0.328 | LOXL1    |
| rs2028387  | 15 | 72014090  | 7.71x10 <sup>-7</sup> | 0.023  | 0.005 | C | 0.328 | LOXL1    |
| rs10770608 | 12 | 20075208  | 7.73x10 <sup>-7</sup> | -0.025 | 0.005 | T | 0.273 | PDE3A    |
| rs2760750  | 17 | 1975678   | 7.86x10 <sup>-7</sup> | 0.030  | 0.006 | G | 0.168 | SMG6     |
| rs8072532  | 17 | 1992023   | 8.73x10 <sup>-7</sup> | -0.024 | 0.005 | G | 0.298 | SMG6     |
| rs4077284  | 15 | 72015444  | 8.90x10 <sup>-7</sup> | 0.023  | 0.005 | A | 0.348 | LOXL1    |
| rs1339862  | 1  | 99828381  | 9.18x10 <sup>-7</sup> | -0.024 | 0.005 | A | 0.320 | PALMD    |
| rs10762788 | 10 | 54000070  | 9.33x10 <sup>-7</sup> | -0.034 | 0.007 | C | 0.227 | MBL2     |
| rs337128   | 5  | 122469381 | 9.44x10 <sup>-7</sup> | -0.021 | 0.004 | A | 0.454 | PPIC     |
| rs12579720 | 12 | 20065031  | 9.59x10 <sup>-7</sup> | -0.027 | 0.005 | C | 0.239 | PDE3A    |
| rs6702910  | 1  | 99831623  | 9.82x10 <sup>-7</sup> | -0.023 | 0.005 | C | 0.410 | PALMD    |
| rs2392040  | 1  | 99828833  | 1.01x10 <sup>-6</sup> | -0.022 | 0.005 | C | 0.398 | PALMD    |
| rs4886776  | 15 | 72012049  | 1.06x10 <sup>-6</sup> | 0.023  | 0.005 | A | 0.328 | LOXL1    |
| rs6577383  | 1  | 99823377  | 1.06x10 <sup>-6</sup> | -0.023 | 0.005 | T | 0.315 | PALMD    |
| rs1992314  | 15 | 72010820  | 1.08x10 <sup>-6</sup> | 0.023  | 0.005 | G | 0.328 | LOXL1    |
| rs1416889  | 1  | 99822280  | 1.12x10 <sup>-6</sup> | -0.023 | 0.005 | T | 0.315 | PALMD    |
| rs10783114 | 1  | 99817738  | 1.17x10 <sup>-6</sup> | -0.023 | 0.005 | C | 0.313 | PALMD    |



|            |    |          |                       |        |       |   |       |        |
|------------|----|----------|-----------------------|--------|-------|---|-------|--------|
| rs7358616  | 12 | 20119522 | 1.18x10 <sup>-6</sup> | -0.024 | 0.005 | C | 0.294 | PDE3A  |
| rs1339856  | 1  | 99816377 | 1.19x10 <sup>-6</sup> | -0.023 | 0.005 | A | 0.314 | PALMD  |
| rs1339857  | 1  | 99816237 | 1.19x10 <sup>-6</sup> | -0.023 | 0.005 | A | 0.314 | PALMD  |
| rs1339858  | 1  | 99815973 | 1.20x10 <sup>-6</sup> | -0.023 | 0.005 | G | 0.313 | PALMD  |
| rs7973599  | 12 | 20055809 | 1.31x10 <sup>-6</sup> | -0.029 | 0.006 | G | 0.219 | PDE3A  |
| rs7513849  | 1  | 99805424 | 1.39x10 <sup>-6</sup> | -0.025 | 0.005 | G | 0.307 | PALMD  |
| rs2027357  | 1  | 99805115 | 1.41x10 <sup>-6</sup> | -0.025 | 0.005 | C | 0.314 | PALMD  |
| rs7213347  | 17 | 2100007  | 1.52x10 <sup>-6</sup> | -0.024 | 0.005 | G | 0.293 | SMG6   |
| rs6672117  | 1  | 99835005 | 1.55x10 <sup>-6</sup> | -0.022 | 0.005 | A | 0.341 | PALMD  |
| rs2760734  | 17 | 1974394  | 1.59x10 <sup>-6</sup> | 0.029  | 0.006 | T | 0.168 | SMG6   |
| rs1556947  | 1  | 99810538 | 1.63x10 <sup>-6</sup> | -0.023 | 0.005 | G | 0.315 | PALMD  |
| rs10770607 | 12 | 20071508 | 1.64x10 <sup>-6</sup> | -0.024 | 0.005 | C | 0.273 | PDE3A  |
| rs6577387  | 1  | 99833137 | 1.67x10 <sup>-6</sup> | -0.024 | 0.005 | G | 0.307 | PALMD  |
| rs7554955  | 1  | 99809622 | 1.69x10 <sup>-6</sup> | -0.023 | 0.005 | G | 0.316 | PALMD  |
| rs1339861  | 1  | 99828206 | 1.69x10 <sup>-6</sup> | -0.024 | 0.005 | G | 0.305 | PALMD  |
| rs4762912  | 12 | 20056731 | 1.97x10 <sup>-6</sup> | -0.028 | 0.006 | G | 0.230 | PDE3A  |
| rs1984749  | 17 | 2196654  | 2.39x10 <sup>-6</sup> | 0.022  | 0.005 | C | 0.361 | SGSM2  |
| rs216195   | 17 | 2149917  | 2.39x10 <sup>-6</sup> | -0.023 | 0.005 | G | 0.295 | SMG6   |
| rs11166274 | 1  | 99799123 | 2.47x10 <sup>-6</sup> | -0.028 | 0.006 | G | 0.198 | PALMD  |
| rs4762922  | 12 | 20108916 | 2.59x10 <sup>-6</sup> | -0.023 | 0.005 | C | 0.278 | PDE3A  |
| rs1416892  | 1  | 99833641 | 2.69x10 <sup>-6</sup> | -0.023 | 0.005 | C | 0.313 | PALMD  |
| rs10505842 | 12 | 20059562 | 2.75x10 <sup>-6</sup> | -0.026 | 0.006 | A | 0.227 | PDE3A  |
| rs1522778  | 15 | 36322883 | 3.04x10 <sup>-6</sup> | 0.023  | 0.005 | A | 0.397 | SPRED1 |
| rs11188500 | 10 | 82875521 | 3.18x10 <sup>-6</sup> | -0.035 | 0.008 | C | 0.168 | SH2D4B |
| rs6679163  | 1  | 99836966 | 3.22x10 <sup>-6</sup> | -0.023 | 0.005 | A | 0.306 | PALMD  |
| rs6662233  | 1  | 99832322 | 3.23x10 <sup>-6</sup> | -0.022 | 0.005 | A | 0.311 | PALMD  |
| rs1339863  | 1  | 99832047 | 3.25x10 <sup>-6</sup> | -0.022 | 0.005 | T | 0.312 | PALMD  |
| rs7085224  | 10 | 53971746 | 3.30x10 <sup>-6</sup> | -0.033 | 0.007 | G | 0.182 | MBL2   |
| rs7518931  | 1  | 99833976 | 3.31x10 <sup>-6</sup> | -0.022 | 0.005 | C | 0.311 | PALMD  |
| rs1339864  | 1  | 99833117 | 3.34x10 <sup>-6</sup> | -0.022 | 0.005 | G | 0.311 | PALMD  |
| rs6665212  | 1  | 99832285 | 3.43x10 <sup>-6</sup> | -0.022 | 0.005 | T | 0.312 | PALMD  |
| rs10875238 | 1  | 99832188 | 3.51x10 <sup>-6</sup> | -0.020 | 0.004 | T | 0.415 | PALMD  |

|            |    |           |           |        |       |   |       |        |
|------------|----|-----------|-----------|--------|-------|---|-------|--------|
| rs7526002  | 1  | 99836609  | 3.67x10-6 | -0.022 | 0.005 | C | 0.305 | PALMD  |
| rs335206   | 5  | 122532465 | 3.82x10-6 | -0.020 | 0.004 | C | 0.478 | PPIC   |
| rs7900164  | 10 | 53976706  | 3.89x10-6 | -0.033 | 0.007 | G | 0.181 | MBL2   |
| rs7952739  | 12 | 20057605  | 3.96x10-6 | -0.026 | 0.006 | A | 0.225 | PDE3A  |
| rs335205   | 5  | 122532581 | 3.96x10-6 | -0.020 | 0.004 | C | 0.478 | PPIC   |
| rs335201   | 5  | 122537548 | 4.04x10-6 | -0.020 | 0.004 | A | 0.476 | PPIC   |
| rs7967625  | 12 | 20057478  | 4.06x10-6 | -0.026 | 0.006 | T | 0.225 | PDE3A  |
| rs7530446  | 1  | 99836551  | 4.08x10-6 | -0.022 | 0.005 | A | 0.305 | PALMD  |
| rs2392039  | 1  | 99835670  | 4.11x10-6 | -0.022 | 0.005 | G | 0.306 | PALMD  |
| rs1881747  | 10 | 54003581  | 4.11x10-6 | -0.033 | 0.007 | C | 0.182 | MBL2   |
| rs4445492  | 1  | 99836935  | 4.14x10-6 | -0.022 | 0.005 | T | 0.305 | PALMD  |
| rs10770588 | 12 | 20036021  | 4.14x10-6 | -0.025 | 0.005 | G | 0.272 | PDE3A  |
| rs10743357 | 12 | 20137595  | 4.17x10-6 | -0.026 | 0.006 | C | 0.258 | PDE3A  |
| rs162953   | 5  | 122527547 | 4.19x10-6 | -0.021 | 0.005 | G | 0.487 | PPIC   |
| rs3983568  | 12 | 20058482  | 4.27x10-6 | -0.027 | 0.006 | G | 0.227 | PDE3A  |
| rs2893417  | 1  | 99835358  | 4.29x10-6 | -0.022 | 0.005 | A | 0.306 | PALMD  |
| rs10841427 | 12 | 20046661  | 4.36x10-6 | -0.026 | 0.006 | T | 0.236 | PDE3A  |
| rs10770599 | 12 | 20057214  | 4.39x10-6 | -0.027 | 0.006 | G | 0.220 | PDE3A  |
| rs4762915  | 12 | 20056827  | 4.51x10-6 | -0.026 | 0.006 | A | 0.223 | PDE3A  |
| rs10841430 | 12 | 20056134  | 4.52x10-6 | -0.027 | 0.006 | G | 0.220 | PDE3A  |
| rs7960456  | 12 | 20056028  | 4.54x10-6 | -0.027 | 0.006 | T | 0.220 | PDE3A  |
| rs7980458  | 12 | 20053838  | 4.56x10-6 | -0.027 | 0.006 | T | 0.225 | PDE3A  |
| rs10219487 | 12 | 20053152  | 4.56x10-6 | -0.027 | 0.006 | T | 0.225 | PDE3A  |
| rs7980996  | 12 | 20057377  | 4.62x10-6 | -0.026 | 0.006 | G | 0.224 | PDE3A  |
| rs10505843 | 12 | 20059354  | 4.68x10-6 | -0.026 | 0.006 | T | 0.234 | PDE3A  |
| rs12566247 | 1  | 43540156  | 4.77x10-6 | 0.024  | 0.005 | T | 0.336 | TIE1   |
| rs11634989 | 15 | 36320860  | 4.83x10-6 | 0.023  | 0.005 | G | 0.385 | SPRED1 |
| rs6577389  | 1  | 99837187  | 4.86x10-6 | -0.022 | 0.005 | A | 0.304 | PALMD  |
| rs1522780  | 15 | 36323341  | 5.06x10-6 | 0.023  | 0.005 | A | 0.385 | SPRED1 |

**eTable 9. SNPs Associated With LA Size With *P* Value <10<sup>-5</sup>**

| SNP        | chromosome | position  | meta-analysis P-value | meta-analysis beta | meta-analysis SE | coded allele | allele frequency | Nearest Gene |
|------------|------------|-----------|-----------------------|--------------------|------------------|--------------|------------------|--------------|
| rs216196   | 17         | 2149693   | 9.34x10 <sup>-7</sup> | -0.037             | 0.008            | C            | 0.269            | SMG6         |
| rs4790312  | 17         | 1928230   | 2.62x10 <sup>-6</sup> | 0.033              | 0.007            | T            | 0.482            | SMG6         |
| rs6978848  | 7          | 11213667  | 2.87x10 <sup>-6</sup> | 0.032              | 0.007            | G            | 0.427            | PHF14        |
| rs216215   | 17         | 2087418   | 2.88x10 <sup>-6</sup> | -0.033             | 0.007            | C            | 0.274            | SMG6         |
| rs6949976  | 7          | 11214902  | 2.98x10 <sup>-6</sup> | 0.032              | 0.007            | C            | 0.427            | PHF14        |
| rs12449600 | 17         | 1928996   | 3.73x10 <sup>-6</sup> | 0.033              | 0.007            | A            | 0.580            | SMG6         |
| rs2623347  | 3          | 100620001 | 4.23x10 <sup>-6</sup> | 0.049              | 0.011            | C            | 0.143            | COL8A1       |
| rs7302727  | 12         | 5030047   | 4.51x10 <sup>-6</sup> | 0.047              | 0.010            | A            | 0.167            | KCNA5        |
| rs13166731 | 5          | 33659692  | 4.60x10 <sup>-6</sup> | 0.053              | 0.012            | A            | 0.110            | ADAMTS12     |
| rs7715934  | 5          | 33659517  | 4.61x10 <sup>-6</sup> | 0.054              | 0.012            | G            | 0.111            | ADAMTS12     |
| rs9898390  | 17         | 2124234   | 5.42x10 <sup>-6</sup> | -0.033             | 0.007            | C            | 0.271            | SMG6         |
| rs216182   | 17         | 2119813   | 5.44x10 <sup>-6</sup> | -0.033             | 0.007            | G            | 0.272            | SMG6         |
| rs216224   | 17         | 2103035   | 6.06x10 <sup>-6</sup> | -0.033             | 0.007            | C            | 0.268            | SMG6         |
| rs170041   | 17         | 2116966   | 6.07x10 <sup>-6</sup> | -0.033             | 0.007            | T            | 0.267            | SMG6         |
| rs13184524 | 5          | 33659742  | 6.14x10 <sup>-6</sup> | 0.051              | 0.011            | T            | 0.101            | ADAMTS12     |
| rs2038677  | 17         | 2124842   | 6.25x10 <sup>-6</sup> | -0.032             | 0.007            | C            | 0.272            | SMG6         |
| rs10466865 | 12         | 126073052 | 6.30x10 <sup>-6</sup> | 0.055              | 0.012            | C            | 0.092            | TMEM132B     |
| rs7200990  | 16         | 88364008  | 6.70x10 <sup>-6</sup> | 0.163              | 0.036            | T            | 0.032            | FANCA        |
| rs6455175  | 6          | 67681986  | 7.57x10 <sup>-6</sup> | -0.031             | 0.007            | C            | 0.418            | EGFL11       |
| rs4631258  | 6          | 67647174  | 8.02x10 <sup>-6</sup> | -0.035             | 0.008            | T            | 0.261            | EGFL11       |
| rs1250586  | 10         | 80647406  | 9.79x10 <sup>-6</sup> | -0.030             | 0.007            | T            | 0.347            | ZMIZ1        |
| rs9899411  | 17         | 1929702   | 9.90x10 <sup>-6</sup> | 0.030              | 0.007            | A            | 0.475            | SMG6         |

**eTable 10. Contribution of SNPs to  $R^2$  of Traits**

| <b>phenotype</b>                                                            | <b><math>R^2</math>, no SNPs</b> | <b><math>R^2</math>, with SNPs</b> | <b>Increment in <math>R^2</math></b> |
|-----------------------------------------------------------------------------|----------------------------------|------------------------------------|--------------------------------------|
| <b>CHS</b>                                                                  |                                  |                                    |                                      |
| LV diastolic dimensions                                                     | 0.2349                           | 0.2366                             | 0.0017                               |
| Aortic root                                                                 | 0.2616                           | 0.2725                             | 0.0109                               |
| <b>GHS</b>                                                                  |                                  |                                    |                                      |
| LV diastolic dimensions                                                     | 0.2786                           | 0.2824                             | 0.0038                               |
| <b>KORA</b>                                                                 |                                  |                                    |                                      |
| LV diastolic dimensions                                                     | 0.196093                         | 0.20077                            | 0.004677                             |
| Aortic root                                                                 | 0.324154                         | 0.337167                           | 0.013013                             |
| <b>RS</b>                                                                   |                                  |                                    |                                      |
| LV diastolic dimensions                                                     | 0.20144                          | 0.200668                           | 0                                    |
| Aortic root                                                                 | 0.243143                         | 0.263241                           | 0.020098                             |
| <b>FHS*</b>                                                                 |                                  |                                    |                                      |
| LV diastolic dimensions                                                     |                                  |                                    | 0.005066                             |
| Aortic root                                                                 |                                  |                                    | 0.029828                             |
| *FHS used linear mixed effects models, and so data format differs in table. |                                  |                                    |                                      |

## References

- (1) Anand IS, Florea VG, Solomon SD, Konstam MA, Udelson JE. Noninvasive assessment of left ventricular remodeling: concepts, techniques, and implications for clinical trials. *J Card Fail* 2002;8:S452-S464.
- (2) Gardin JM. How reliable are serial echocardiographic measurements in detecting regression in left ventricular hypertrophy and changes in function? *J Am Coll Cardiol* 1999;34:1633-1636.
- (3) Devereux RB, Roman MJ, Liu JE et al. An appraisal of echocardiography as an epidemiological tool. The Strong Heart Study. *Ann Epidemiol* 2003;13:238-244.
- (4) Gosse P, Guez D, Gueret P et al. Centralized echocardiogram quality control in a multicenter study of regression of left ventricular hypertrophy in hypertension. *J Hypertens* 1998;16:531-535.
- (5) Palmieri V, Dahlof B, DeQuattro V et al. Reliability of echocardiographic assessment of left ventricular structure and function: the PRESERVE study. Prospective Randomized Study Evaluating Regression of Ventricular Enlargement. *J Am Coll Cardiol* 1999;34:1625-1632.
- (6) Gardin JM, Wong ND, Bommer W et al. Echocardiographic design of a multicenter investigation of free-living elderly subjects: the Cardiovascular Health Study. *J Am Soc Echocardiogr* 1992;5:63-72.
- (7) Gardin JM, Siscovick D, Anton-Culver H et al. Sex, age, and disease affect echocardiographic left ventricular mass and systolic function in the free-living elderly. The Cardiovascular Health Study. *Circulation* 1995;91:1739-1748.
- (8) Sundstrom J, Evans JC, Benjamin EJ et al. Relations of plasma total TIMP-1 levels to cardiovascular risk factors and echocardiographic measures: the Framingham heart study. *Eur Heart J* 2004;25:1509-1516.
- (9) Rabbee N, Speed TP. A genotype calling algorithm for affymetrix SNP arrays. *Bioinformatics* 2006;22:7-12.
- (10) Pompanon F, Bonin A, Bellemain E, Taberlet P. Genotyping errors: causes, consequences and solutions. *Nat Rev Genet* 2005;6:847-859.
- (11) Li Y, Abecasis GR. Mach 1.0: Rapid Haplotype Reconstruction and Missing Genotype Inference. *Am J Hum Genet* 2008; S79: 2290.
- (12) Marchini J, Howie B, Myers S, McVean G, Donnelly P. A new multipoint method for genome-wide association studies by imputation of genotypes. *Nat Genet* 2007;39:906-913.
- (13) Servin B, Stephens M. Imputation-based analysis of association studies: candidate regions and quantitative traits. *PLoS Genet* 2007;3:e114.
- (14) Bacanu SA, Devlin B, Roeder K. Association studies for quantitative traits in structured populations. *Genet Epidemiol* 2002;22:78-93.
- (15) Price AL, Patterson NJ, Plenge RM et al. Principal components analysis corrects for stratification in genome-wide association studies. *Nat Genet* 2006;38:904-909.
- (16) Buckanovich RJ, Posner JB, Darnell RB. Nova, the paraneoplastic Ri antigen, is homologous to an RNA-binding protein and is specifically expressed in the developing motor system. *Neuron* 1993;11:657-672.

(17) McKinsey TA. Derepression of pathological cardiac genes by members of the CaM kinase superfamily. *Cardiovasc Res* 2007;73:667-677.

(18) Nakamura TY, Iwata Y, Arai Y, Komamura K, Wakabayashi S. Activation of Na<sup>+</sup>/H<sup>+</sup> Exchanger 1 Is Sufficient to Generate Ca<sup>2+</sup> Signals That Induce Cardiac Hypertrophy and Heart Failure. *Circ Res* 2008;103:891-899.

(19) Bednarek AK, Laflin KJ, Daniel RL et al. WWOX, a novel WW domain-containing protein mapping to human chromosome 16q23.3-24.1, a region frequently affected in breast cancer. *Cancer Res* 2000;60:2140-2145.

(20) Chang NS, Pratt N, Heath J et al. Hyaluronidase induction of a WW domain-containing oxidoreductase that enhances tumor necrosis factor cytotoxicity. *J Biol Chem* 2001;276:3361-3370.

(21) Bui TD, Levy ER, Subramaniam VN, Lowe SL, Hong W. cDNA characterization and chromosomal mapping of human golgi SNARE GS27 and GS28 to chromosome 17. *Genomics* 1999;57:285-288.

(22) Maki JM, Rasanen J, Tikkanen H et al. Inactivation of the Lysyl Oxidase Gene Lox Leads to Aortic Aneurysms, Cardiovascular Dysfunction, and Perinatal Death in Mice. *Circulation* 2002;106:2503-2509.

(23) Hu B, Copeland NG, Gilbert DJ, Jenkins NA, Kilimann MW. The paralemmin protein family: identification of paralemmin-2, an isoform differentially spliced to AKAP2/AKAP-KL, and of palmdelphin, a more distant cytosolic relative. *Biochem Biophys Res Commun* 2001;285:1369-1376.

**Legend for eFigure 1**

Quantile-quantile plots of the observed against expected  $-\log_{10}$  (p-value) distributions relating SNPs to echocardiographic traits (**Panels A-F**) in a prospective meta-analysis. The lambdas for individual traits that are meta-analyzed are shown in the Panels.

## Legend for eFigure 2

Regional plots for associations in the region centered on select SNPs that were genome-wide significant in Stage 1 and that replicated in Stage 2 (**Panels A-B**). All SNPs are plotted with their meta-analysis p-values (Stage 1) relative to their genomic position. The SNP of interest is shown in black, and the colors of the surrounding SNPs show the strength of the linkage disequilibrium (LD): white is no LD ( $R^2 < 0.2$ ), yellow is weak ( $R^2 \geq 0.2$  but  $< 0.5$ ), orange is moderate ( $R^2 \geq 0.5$  but  $< 0.8$ ) and red is strong ( $R^2 \geq 0.8$ ).

The light blue line represents the estimated recombination rates. Gene annotations are shown as the dark green arrows. If there are no known genes in the region, a purple arrow indicates the nearest gene.



Figure 1A, Q-Q plot for LV mass

1

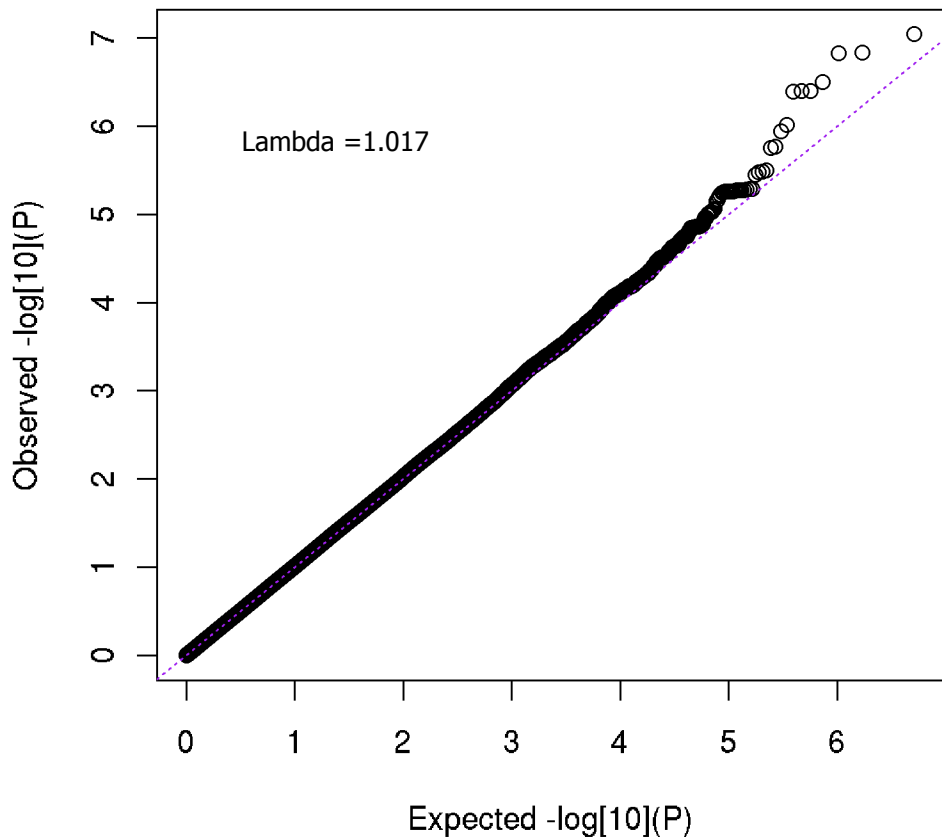

Figure 1B, Q-Q plot for LV Internal Dimensions

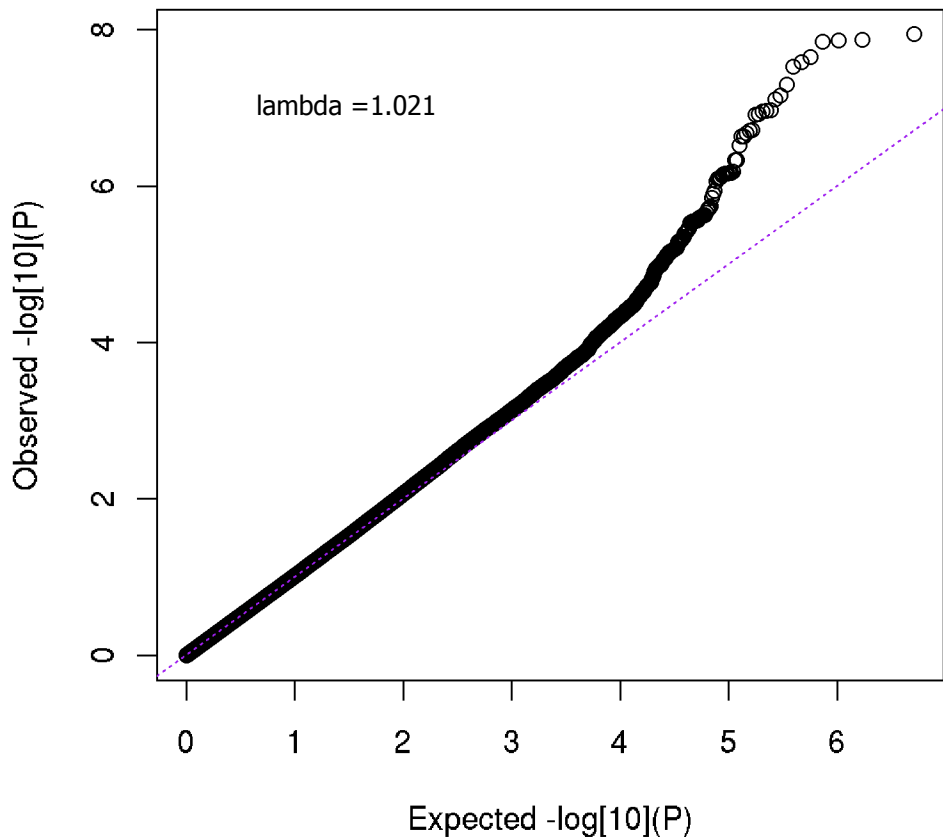

Figure 1C. Q-Q Plot for LV Wall Thickness

43

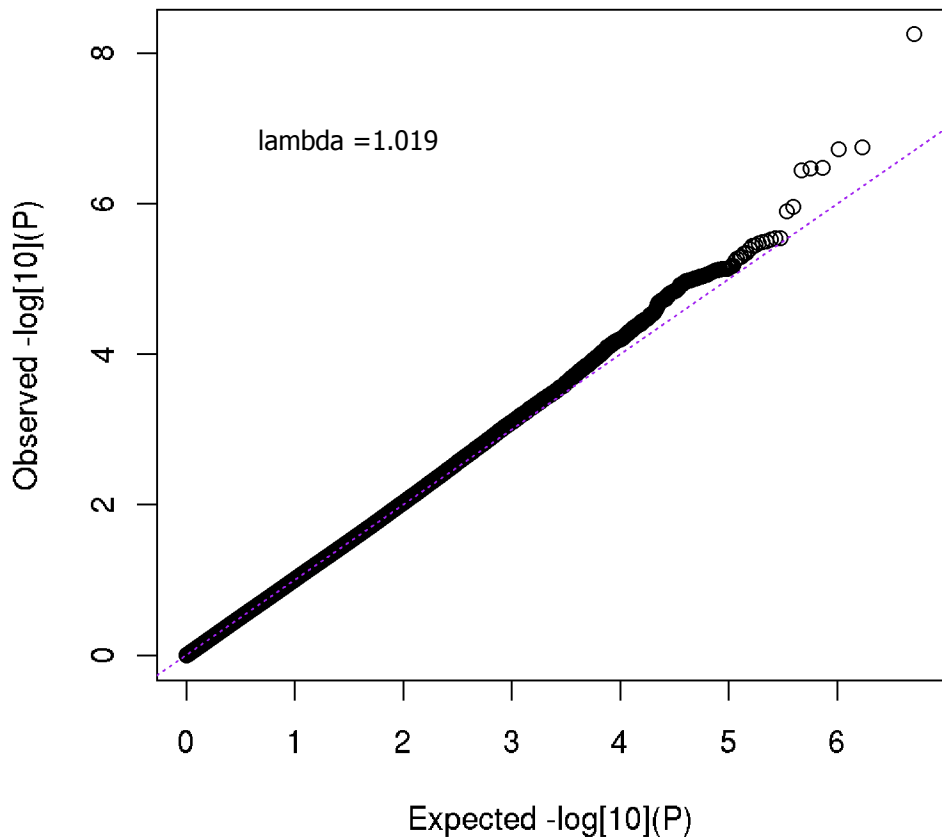

Figure 1D. Q-Q Plot for LV Systolic Dysfunction

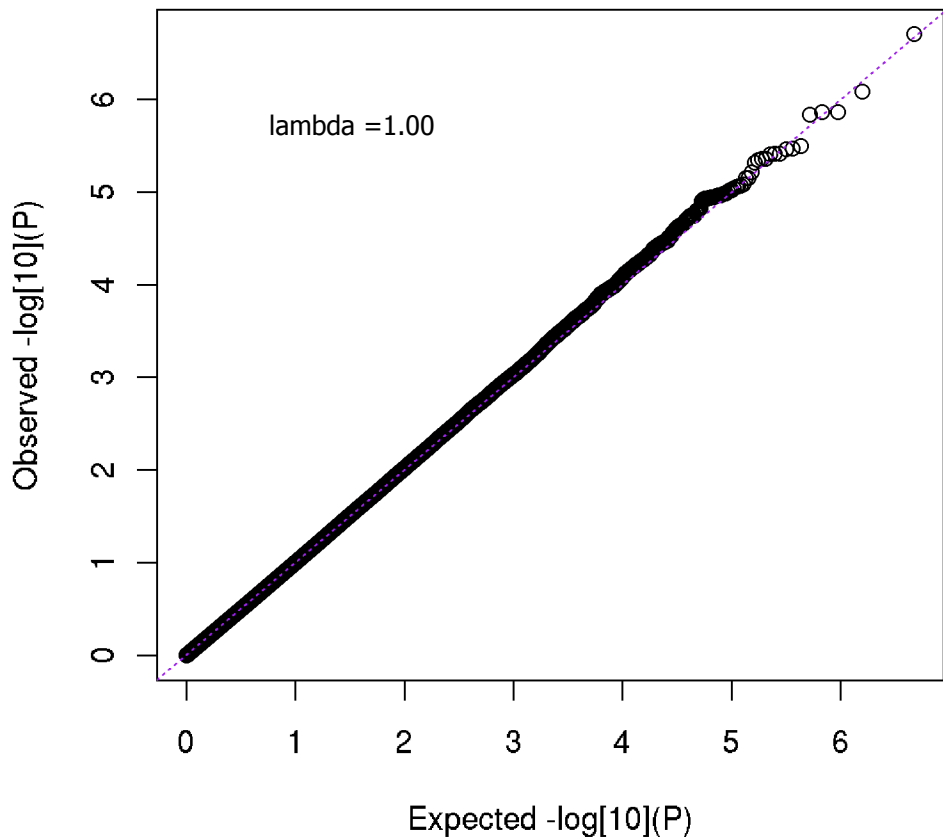

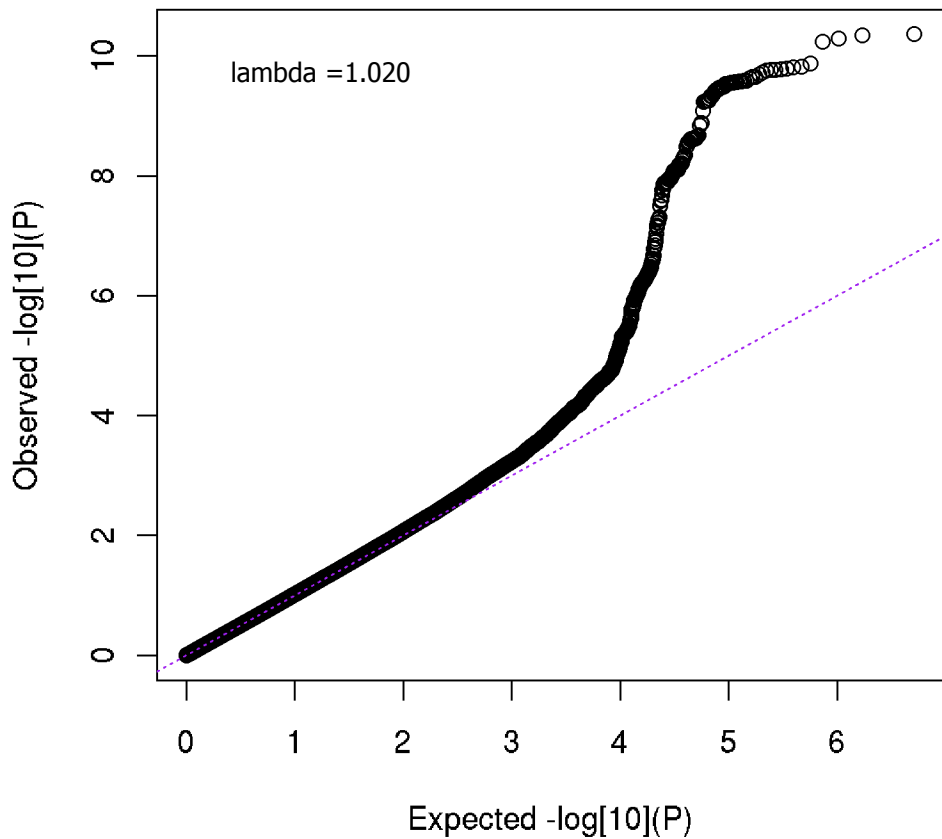

Figure 1F. Q-Q Plot for Left Atrial Size

nction 46

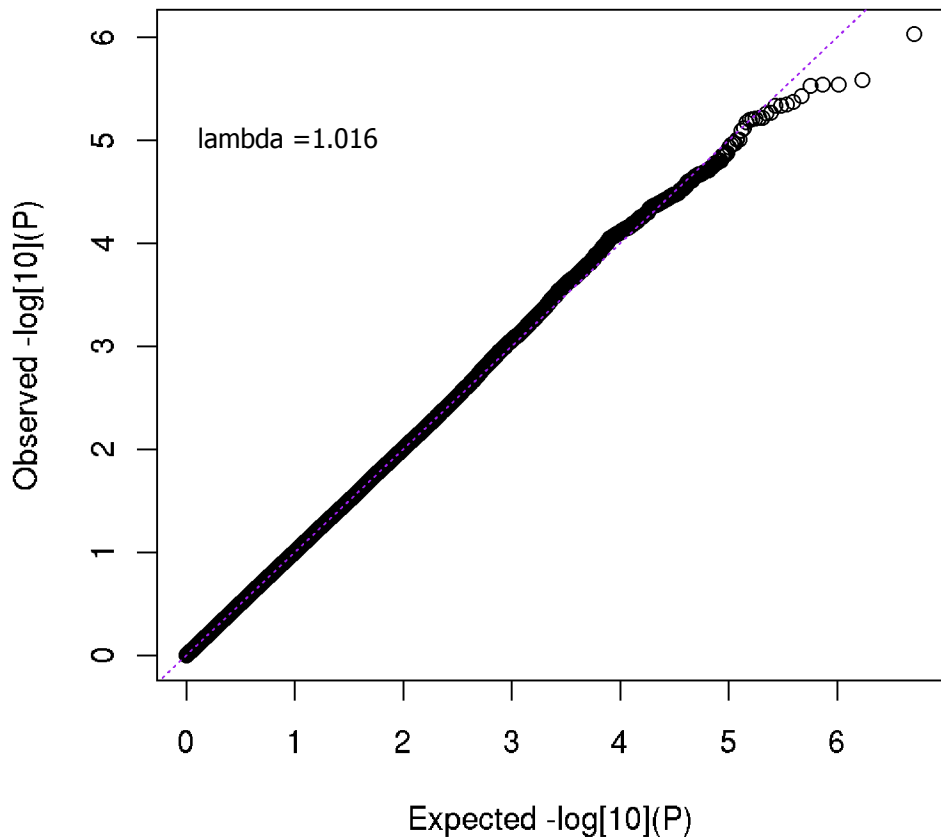

Figure 2A1. SNP Associated With LV Internal Dimensions

### Regional plot for rs89107

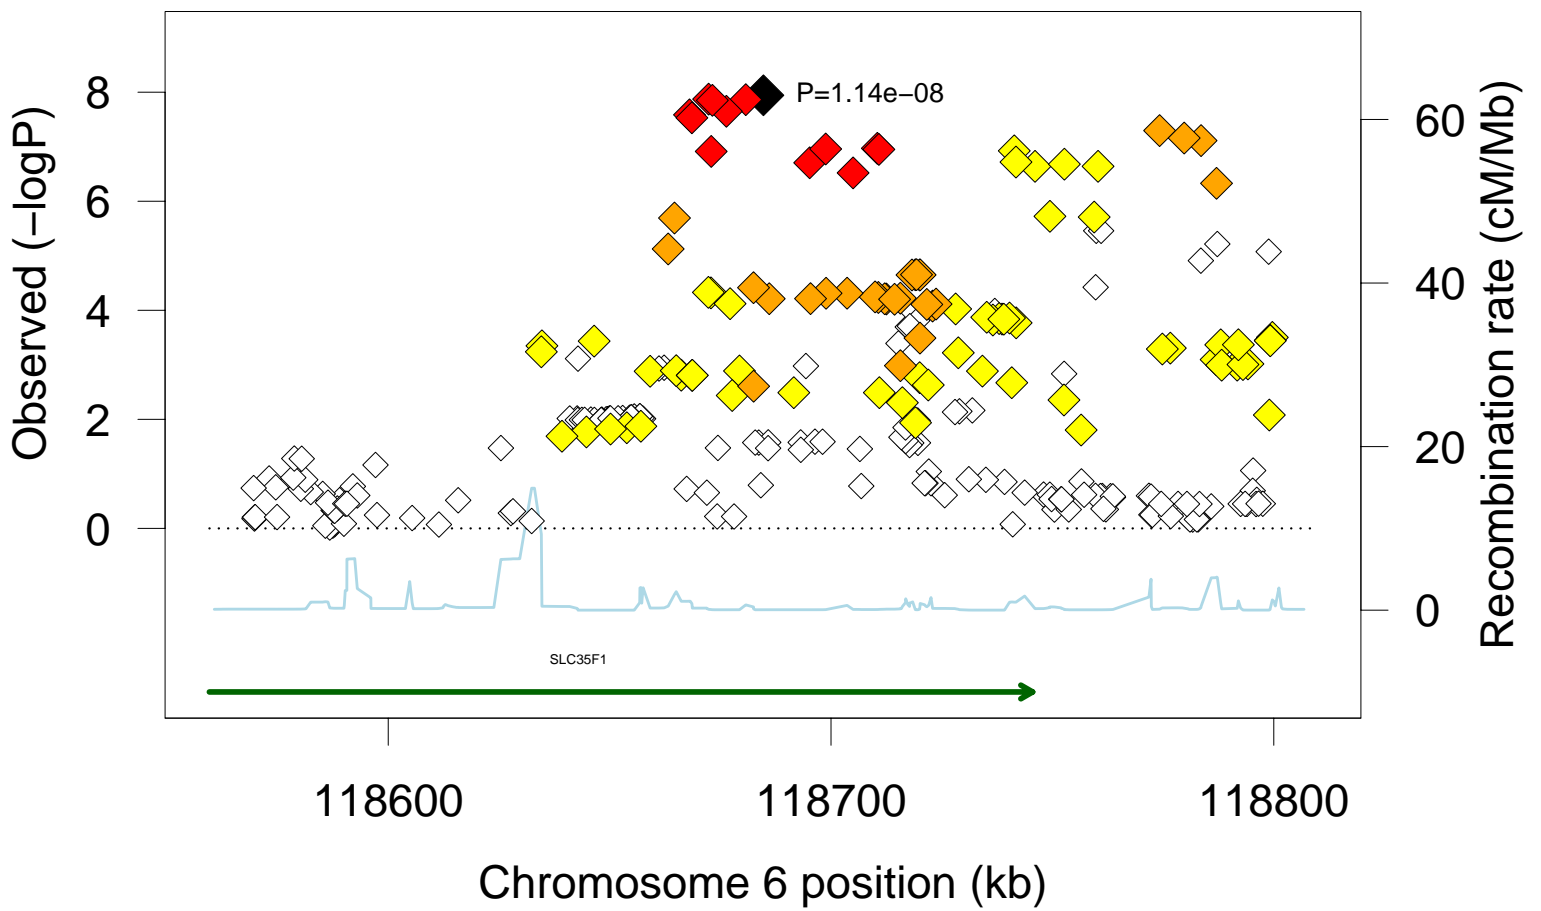

Figure 2A2. SNP Associated With LV Internal Dimensions

### Regional plot for rs11153768

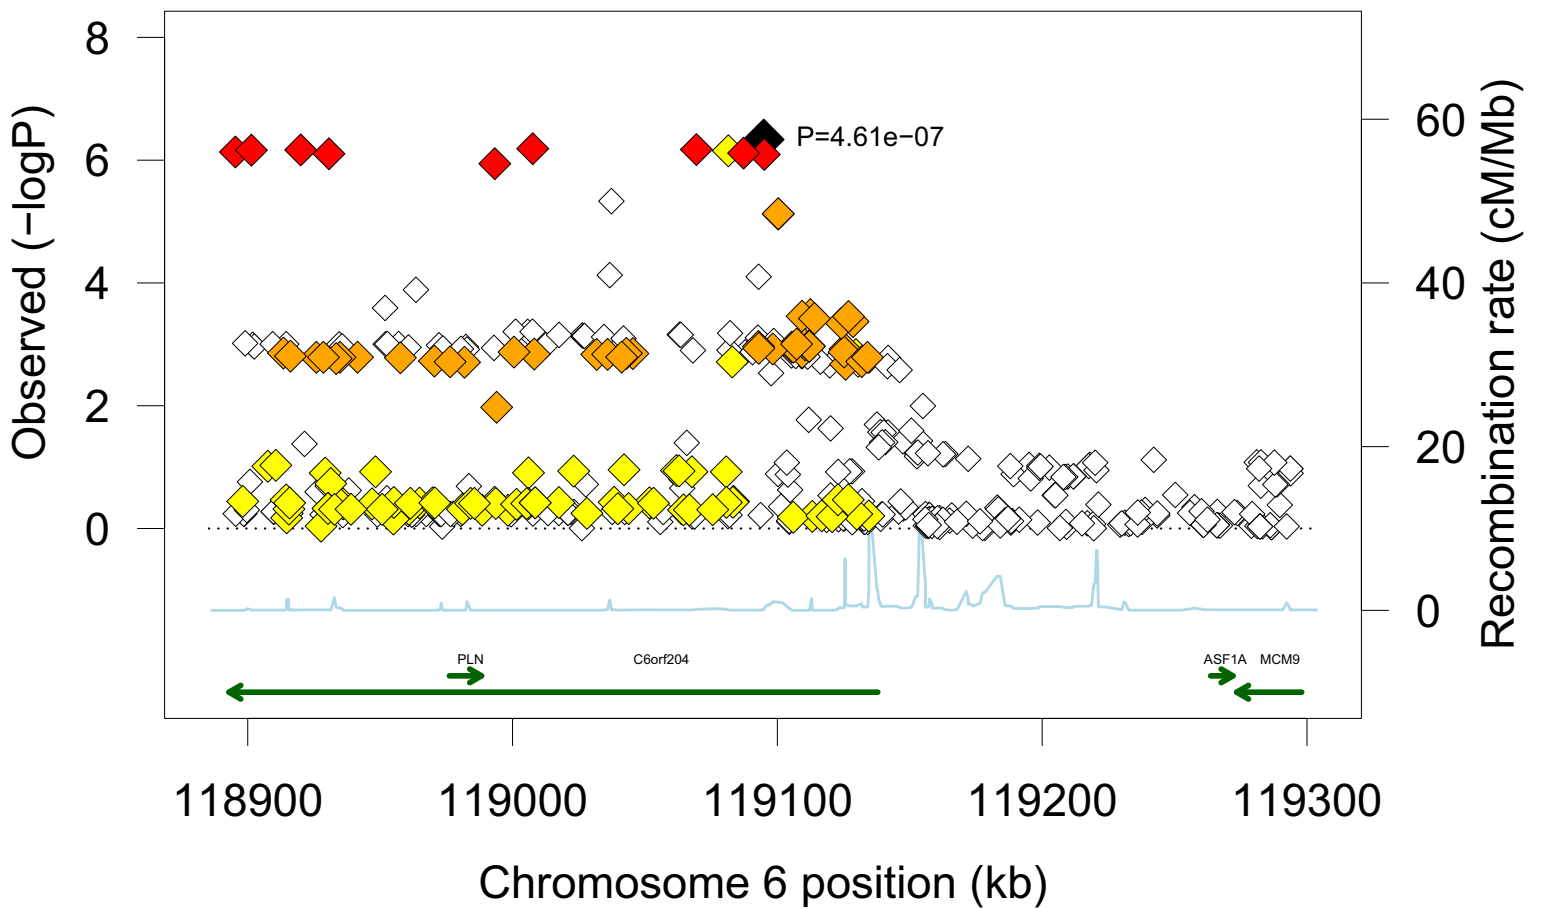



# Regional plot for rs10852932

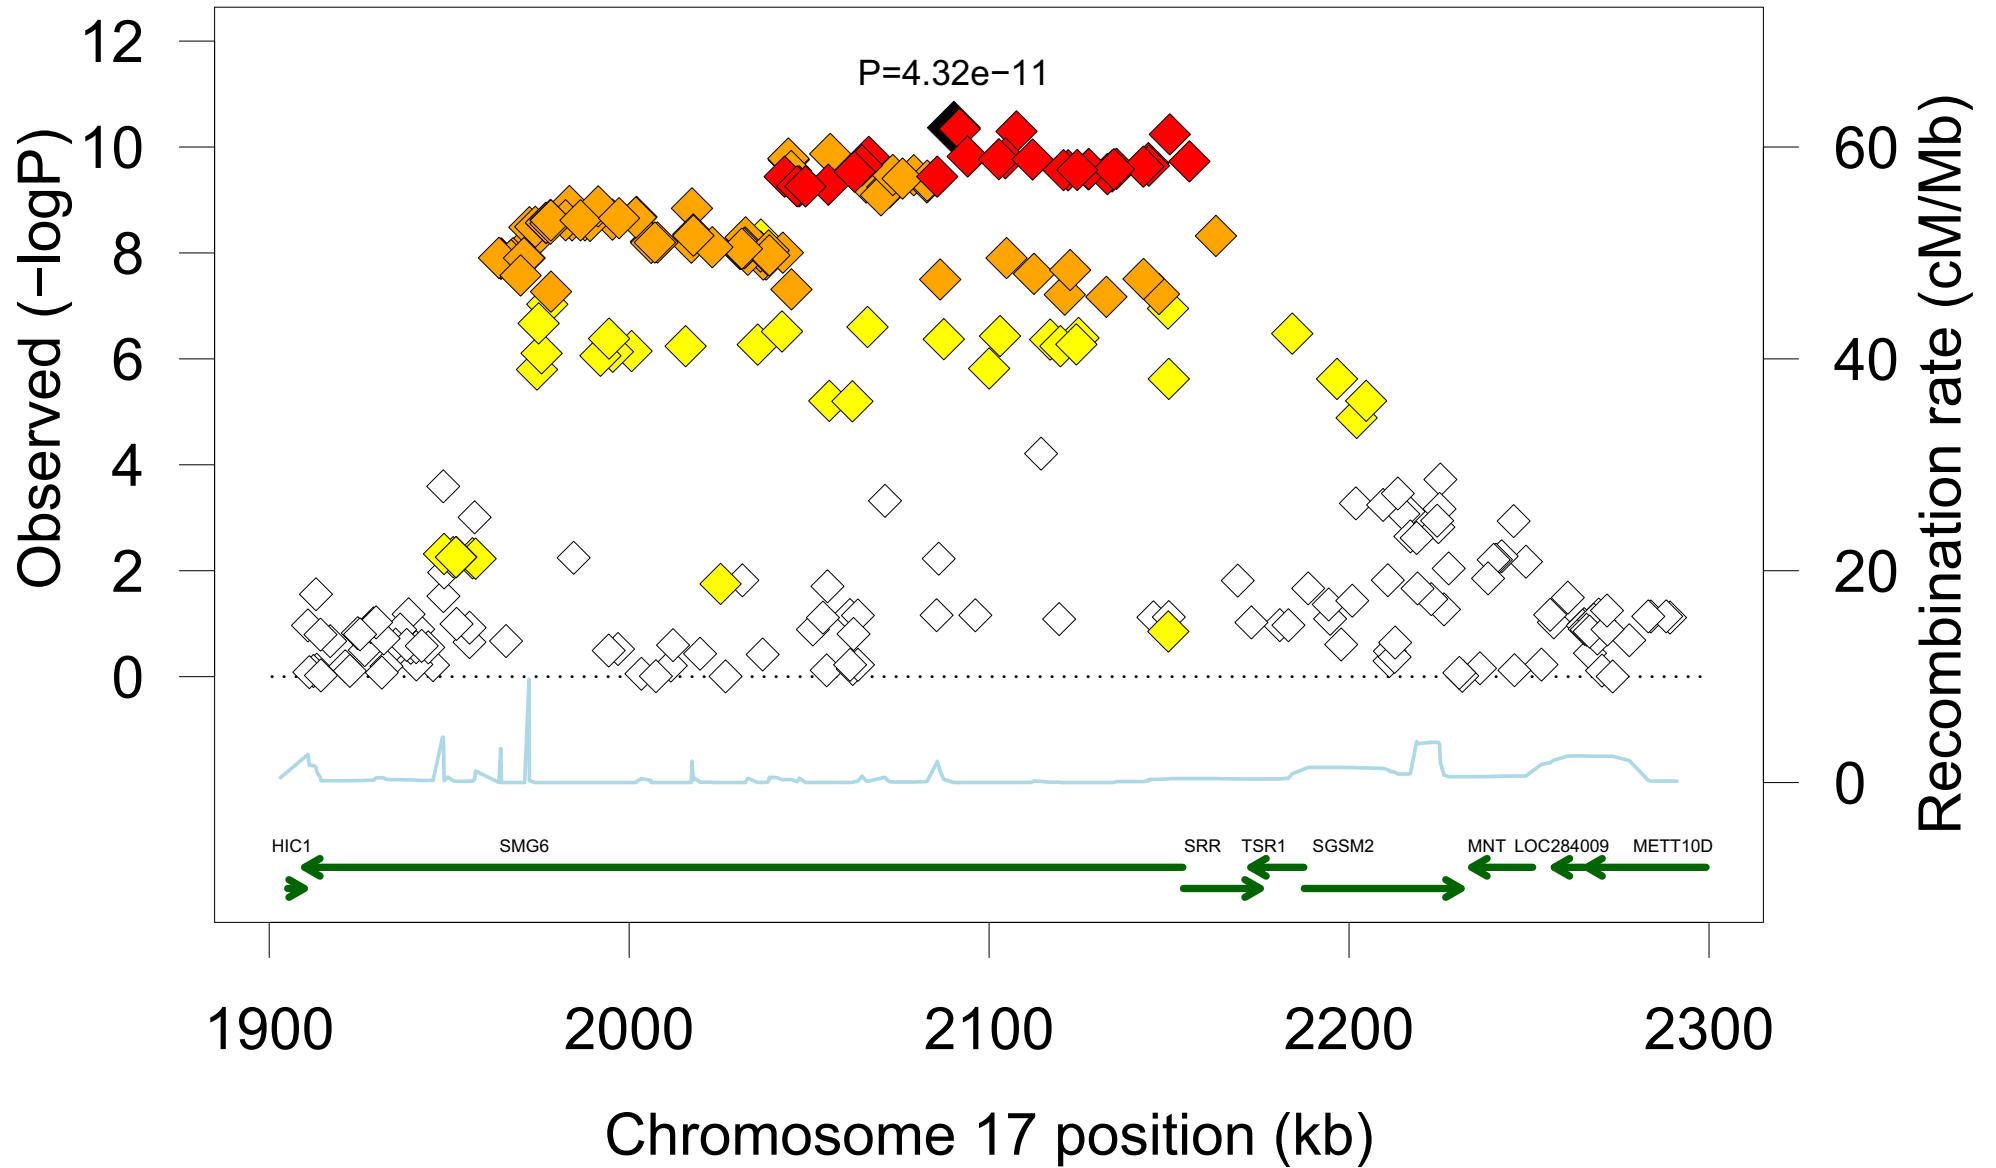

# Regional plot for rs4523957

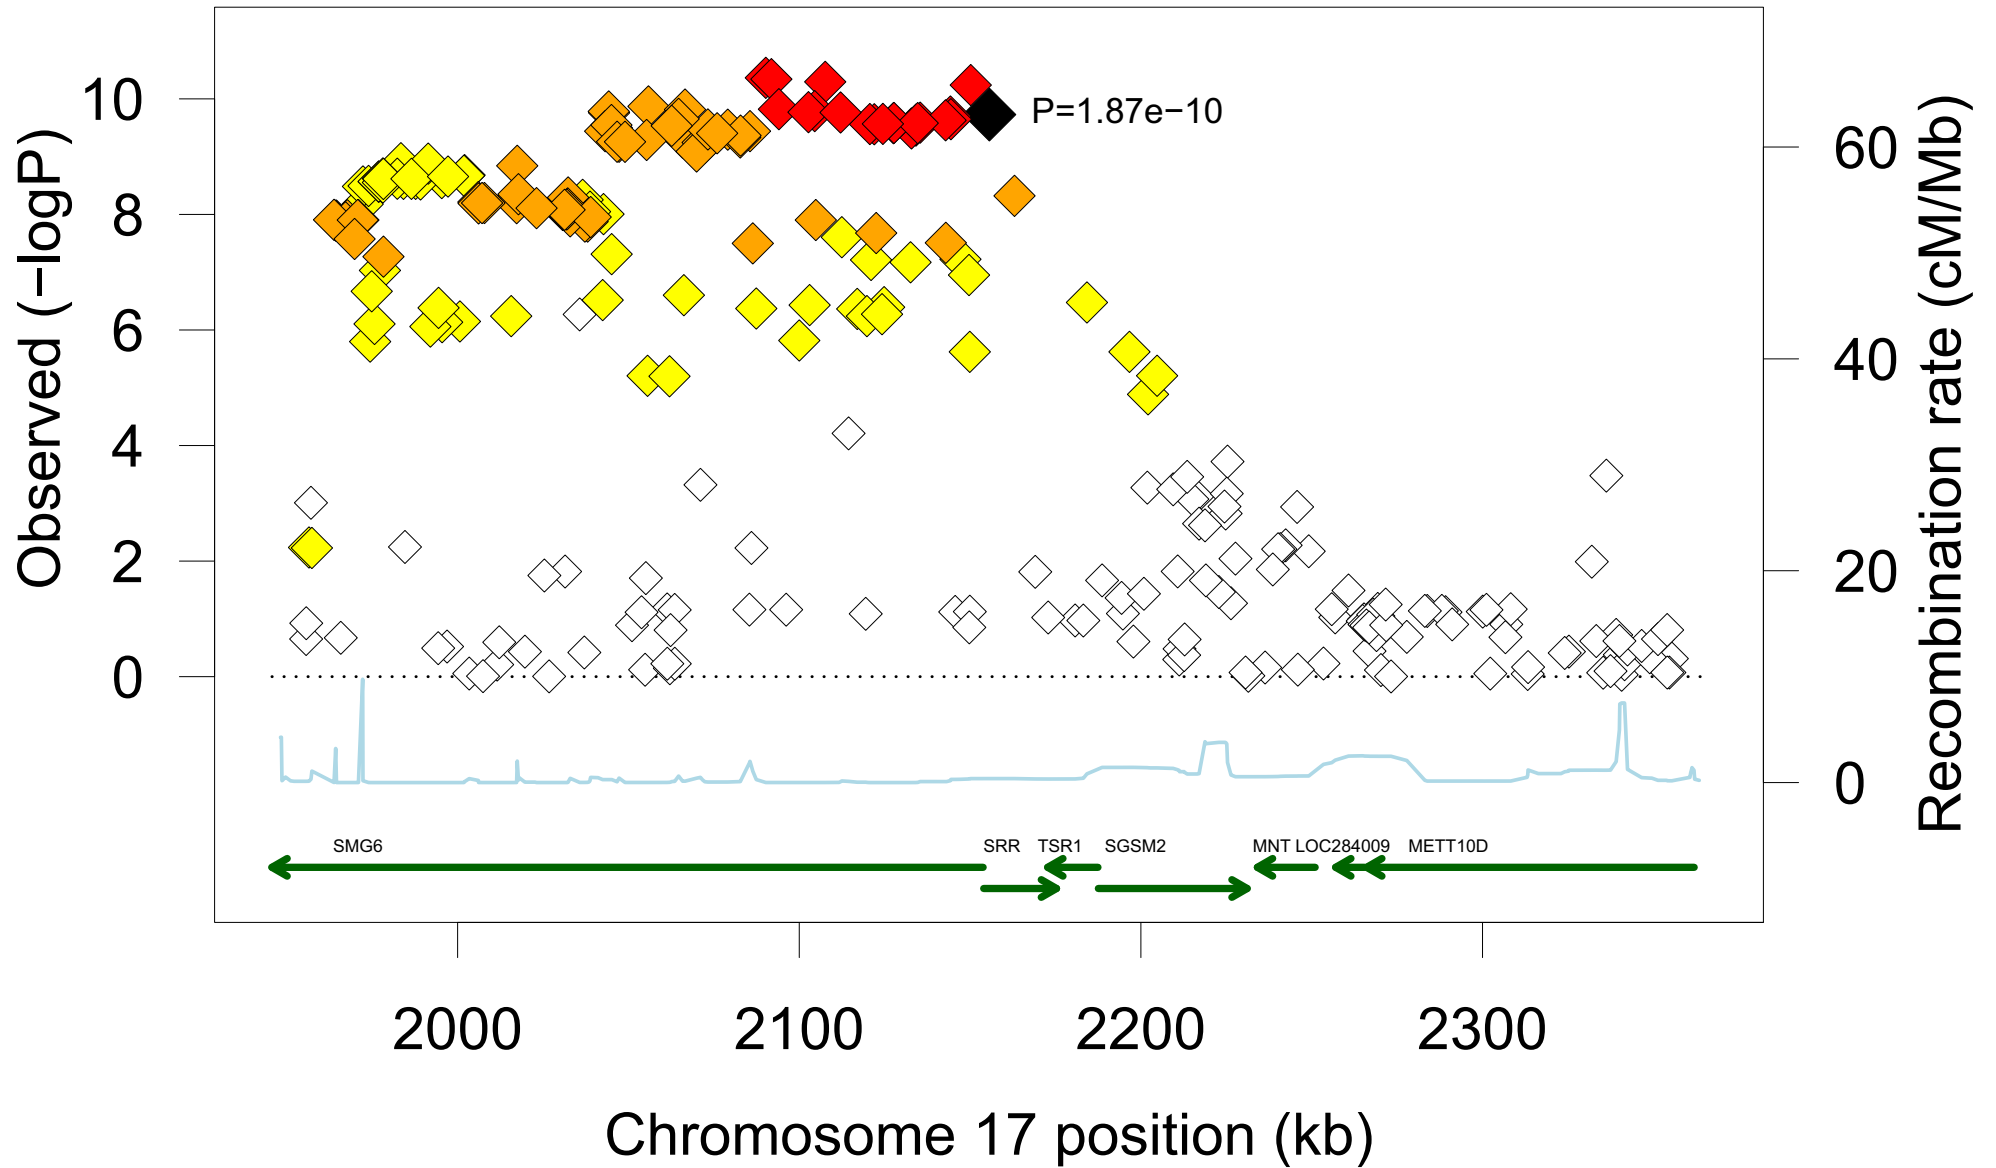

Figure 2B3. SNP Associated With Aortic Root Diameter

### Regional plot for rs17470137

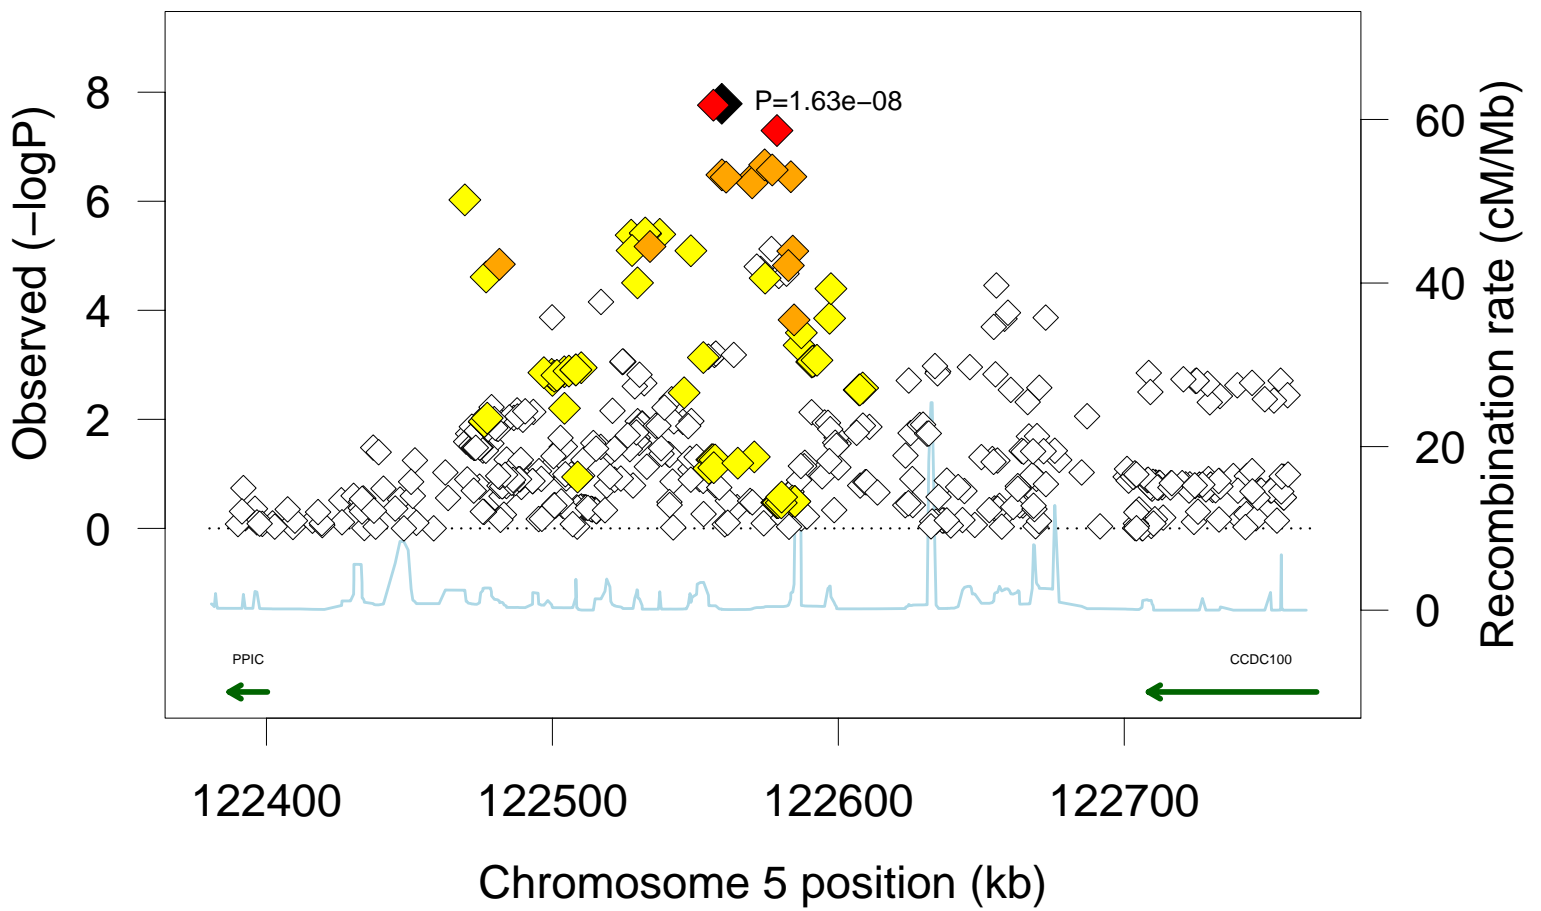

Figure 2B4. SNP Associated With Aortic Root Diameter

### Regional plot for rs4026608

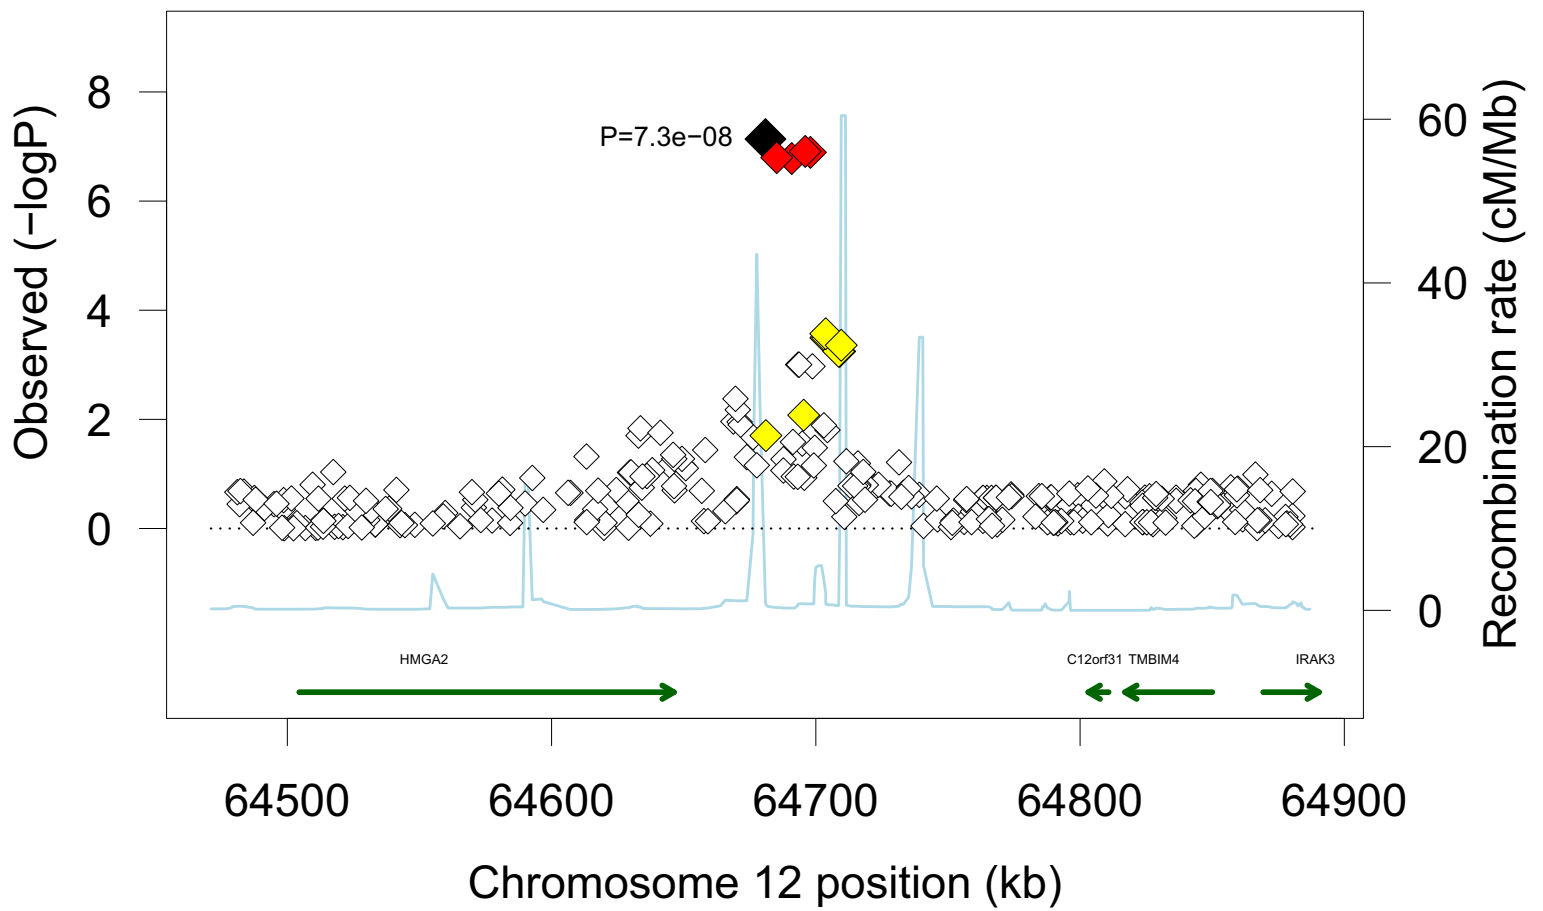

Figure 2B5. SNP Associated With Aortic Root Diameter

## Regional plot for rs10770612

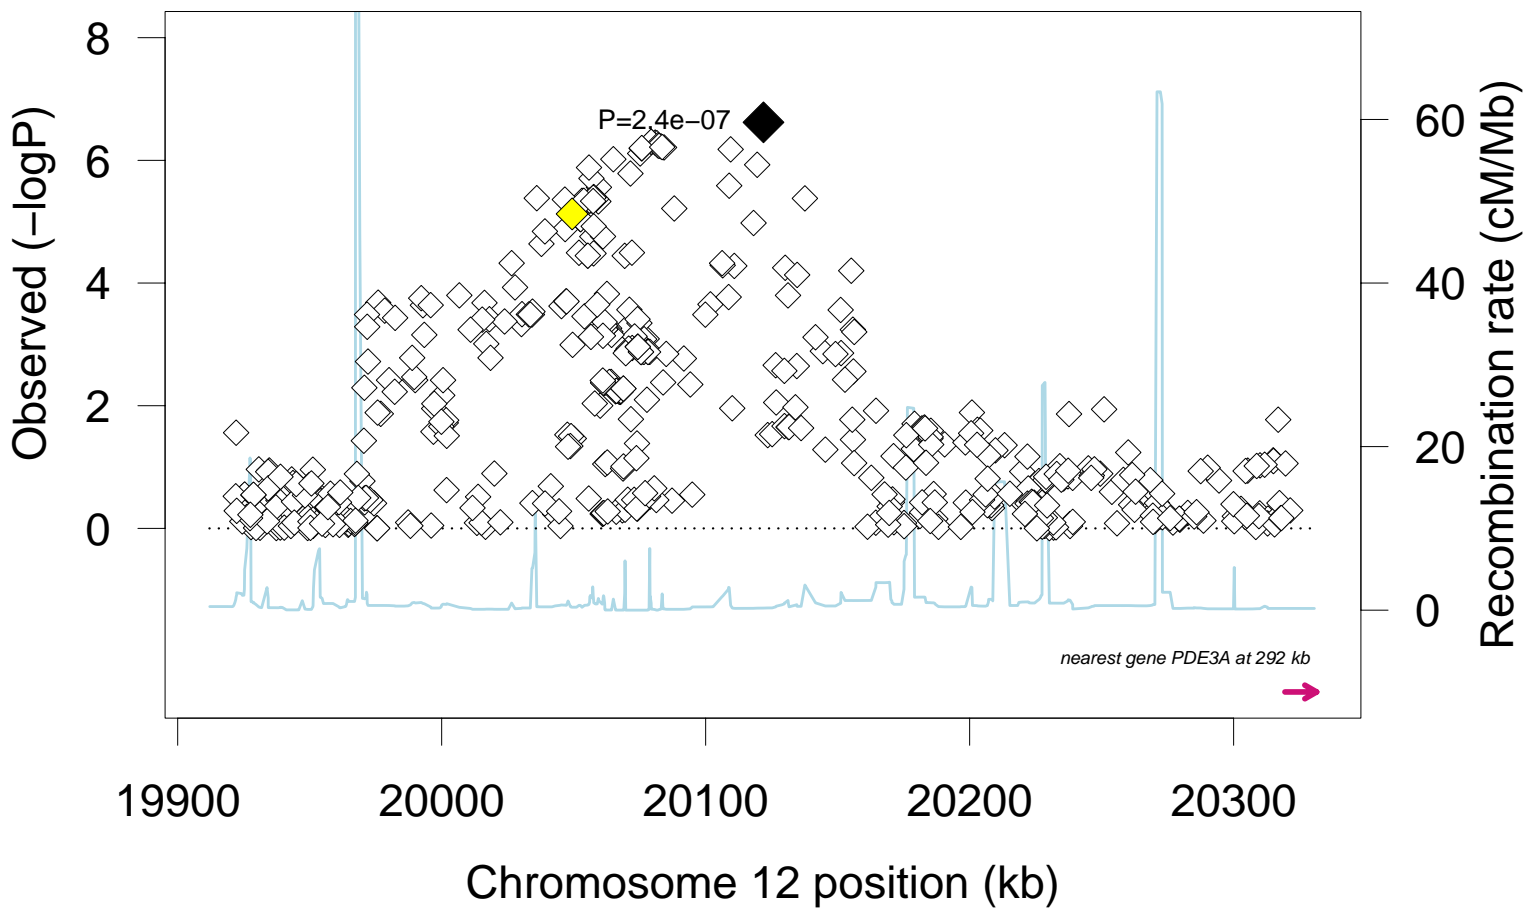

Supplement: NIHMS231613-supplement-Supplemental.pdf [file NIHMS231613-supplement-Supplemental.pdf]
